1       **The highly expressed ERV1 forms virus-like particles for**  
2                   **regulating early embryonic development**

3  
4   **Authors:** Wenjing Li<sup>1,3†</sup>, Shujuan Liu<sup>1,3†</sup>, Jianglin Zhao<sup>1†</sup>, Ruizhi Deng<sup>1†</sup>, Yayi Liu<sup>1</sup>,  
5   Huijia Li<sup>1</sup>, Hongwei Ma<sup>1</sup>, Yanzhi Chen<sup>1</sup>, Jingcheng Zhang<sup>1</sup>, Yongsheng Wang<sup>1</sup>,  
6   Jianmin Su<sup>1</sup>, Fusheng Quan<sup>1</sup>, Xu liu<sup>2\*</sup>, Yan Luo<sup>2\*</sup>, Yong Zhang<sup>1\*</sup>, and Jun Liu<sup>1\*</sup>

7   **Affiliations:**

8   1 College of Veterinary Medicine, Northwest A&F University, Key Laboratory of  
9   Animal Biotechnology of the Ministry of Agriculture, Yangling 712100, Shaanxi,  
10   China.

11   2 Department of Animal Engineering, Yangling Vocational and Technical College,  
12   Yangling 712100, China.

13   3 Reproductive hospital, Jiangxi University of Traditional Chinese Medicine,  
14   Nanchang 330004, Jiangxi, China.

15   † Contributed equally to this work

16   \* Corresponding author. Tel: (+86) 029-87011230, E-mail address:

17   yl\_ly2019@163.com (Yan Luo). Tel: (+86) 029-87080085, E-mail address:

18   zhy1956@263.net (Yong Zhang). Tel: (+86) 029-87080092, E-mail address:

19   liujun2013@nwsuaf.edu.cn (Jun Liu).

20

21   **Running title:** ERV1 essential for early embryonic development

22

23 **Abstract**

24 In mammals, the transcription of transposable elements (TEs) is important for  
25 maintaining early embryonic development. Here, we systematically analyzed the  
26 expression characteristics of TE-derived transcripts in early embryos by constructing  
27 a database of TEs and transcriptome data from goats and using it to study the function  
28 of endogenous retroviruses (ERVs) in regulating early embryo development. We  
29 found that ERV1 made up the highest proportion of TE sequences and exhibited a  
30 stage-specific expression pattern during early embryonic development. Among ERV  
31 elements, ERV1 had the potential to encode the Gag protein domain to form virus-like  
32 particles (VLPs) in early goat embryos. Knockdown of ERV1\_1\_574 significantly  
33 reduced the embryo development rate and the number of trophoblast cells ( $P < 0.05$ ).  
34 Transcriptome sequencing analysis of morula embryos showed that ERV1\_1\_574  
35 mainly regulated the expression of genes related to embryo compaction and  
36 trophoblast cell differentiation, such as CX43 and CDX2. In summary, we found that  
37 ERV1 expression was essential for early embryonic development in goats through  
38 regulation of trophoblast cell differentiation.

39

40 **Keywords:** transposable elements; endogenous retrovirus; virus-like particles;  
41 trophoblast cell differentiation; transcriptome sequences; embryonic development

## 42 **Introduction**

43 TEs are mobile genomic DNA sequences, which are ubiquitous to all organisms and  
44 are an important part of the host genome. In humans (44%), mice (40%), cattle (46%)  
45 and other organisms, TEs account for almost half of the host genome (Lander *et al*,  
46 2001; Waterston *et al*, 2002; Adelson *et al*, 2009), and increasing evidence indicates  
47 that TEs have important effects on the structure, function and evolutionary dynamics  
48 of the genome (Xu & Wang, 2007; Rho & Tang, 2009; Senft & Macfarlan, 2021).

49 Recent studies have reported that a large number of transcripts of TEs have been  
50 discovered at specific stages of early embryonic development, but their biological  
51 functions and regulatory mechanisms have not been fully determined (Gifford *et al*,  
52 2013; Fu *et al*, 2019).

53 Whole-genome sequencing revealed high variability in the number, type, and  
54 sequence of TEs despite the high sequence homology of functional genes in mammals  
55 (Platt *et al*, 2018). At present, the TE sequences of a variety of animals can be  
56 retrieved from the Repbase database, but the sequences of TEs in the goat genome  
57 have not been included or reported yet. Determining the functions and regulatory  
58 mechanisms of TEs in early embryonic development of domestic animals is the key to  
59 revealing their characteristics in early embryo development. Studies have  
60 demonstrated that LINE1 (Beraldi *et al*, 2006), MuERV-L (Kigami *et al*, 2003),  
61 LincGET (Wang *et al*, 2018) and HPAT5 (Durruthy-Durruthy *et al*, 2016), among  
62 others, are essential regulatory elements for maintaining early embryonic  
63 development.

64 ERV elements constitute a large part of the TEs in eukaryotic genomes (Makalowski  
65 *et al*, 2012), accounting for about ten percent of the mammalian genome (Rebollo *et al*,  
66 2012), and many studies showed that ERVs were important for regulating  
67 mammalian gene expression (Friedli & Trono, 2015; Thompson *et al*, 2016). Genes of  
68 the mouse endogenous retrovirus-like (MERVL) virus initiate a large number of  
69 specific transcripts at the two-cell embryo stage (Kigami *et al*, 2003; Macfarlan *et al*,  
70 2012). For example, the ERV-related lncRNA, LincGET, is indispensable for cell  
71 division in mouse embryos (Wang *et al*, 2016). In some ERVs, the Gag sequence has

72 the capacity to encode proteins, and the Gag protein forms VLPs that can infect and  
73 transmit information between cells, thus performing a regulatory and communication  
74 function. In two-cell stage mouse embryos, some MERVL virus sequences can also  
75 encode Gag protein (Macfarlan *et al*, 2012). During *Drosophila* oogenesis, ERV  
76 elements in trophoblasts express VLPs, which can infect oocytes and may regulate  
77 oogenesis (Wang *et al*, 2018). Many mammalian ERV element transcripts have been  
78 discovered in early embryos, but the mechanism of their regulation of embryo  
79 development needs further clarification.

80 In our previous study, we found that ERV-derived lncRNAs affect the development  
81 rate of early goat embryo blastocysts by regulating the expression of the target gene,  
82 CHD1L (Deng *et al*, 2019). In this study, a database of TEs in the goat genome was  
83 established, and the transcriptome of early goat embryos at various stages was  
84 generated by RNA-seq. We systematically analyzed the transcripts of TEs in early  
85 goat embryos, and focused on the expression and function of ERV1. We found that  
86 ERV1\_1\_574 was highly expressed in goats during early embryonic development and  
87 could encode Gag protein and form virus-like particles. Moreover, ERV1\_1\_574  
88 could affect embryo development by regulating embryo densification.

89

## 90 **Results**

### 91 **ERVs are the largest superfamily of TEs in the goat genome**

92 We obtained the sequences of all TEs in the goat genome based on de novo prediction,  
93 structure-based prediction and homology-based prediction strategies (**Fig. S1**). We  
94 classified and annotated the TEs to build a comprehensive, user-friendly, web-based  
95 database (<http://genedenovoweb.ticp.net:81/goatTEdb/>) (**Fig.S2**). A total of 495,065  
96 TEs from 21 super-families and 926 families were included in this database (**Table 1**).  
97 The coverage and classification of TEs in the goat genome were determined by  
98 RepeatMasker. We found that the percentage of the goat genome consisting of TEs  
99 was similar to that of cattle at 46.33%. LINES accounted for 10.31% of the genome,  
100 which was lower than for cattle (23.29%), humans (20.40%) and mice (19.59%).  
101 SINEs made up 2.86% of the goat genome, compared to 17.66% for cattle, 13.11%

102 for humans, and 7.34% for mice. ERVs constituted 28.45% of the goat genome, which  
103 was significantly higher than that of cattle (3.20%), humans (8.56%) and mice  
104 (9.84%). ERV1 had the highest copy number (12,366 members) among all subclasses  
105 in the goat genome (**Table 2**). The goat TEs were evenly distributed in every  
106 chromosome except chromosome 10 (**Fig. S3A**). Using the sequences of the intact  
107 elements to construct a maximum likelihood tree, we identified one BovB, 91 L1, and  
108 41 ERV1 active elements (**Fig. S3B**). The high proportion of ERVs revealed by TE  
109 analysis was a significant feature of the goat genome, in which the ERV1 copy  
110 number was particularly high and contained a large proportion of active elements.

111

### 112 **Transcriptome analysis of early goat embryos using RNA-seq**

113 We collected in vitro fertilized (IVF) early goat embryos at various stages (**Fig. 1A**),  
114 and used RNA-seq technology to obtain the transcriptomes. We aligned the reads to  
115 the goat genome and assembled the transcripts to analyze mRNA and potential  
116 lncRNA expression in early goat embryos (**Fig. S1, Table 3**). Principal component  
117 analysis (PCA) showed that the different developmental stages of embryos could be  
118 separated into distinct groups based on gene counts (**Fig. S4**). The total expression  
119 levels of mRNAs and lncRNAs in 8-cell stage embryos were increased during early  
120 embryonic development (**Fig. 1B**). Large-scale transcriptional activation occurred at  
121 the 8-cell stage, as expected for embryonic genome activation (EGA) of early goat  
122 embryos. The heatmap of dynamic gene expression showed that differentially  
123 expressed genes (DEGs) in 8-cell embryos and morula embryos were different from  
124 the zygote, 2-cell and 4-cell stage embryos (**Fig. 1C**). To further explore the dynamic  
125 expression patterns of DEGs, we divided all developmental stages into three modules  
126 (**Fig. 1D**). The first module included up-regulated genes in zygotic, 2-cell and 4-cell  
127 stages. These were defined as maternal genes and a total of 41 were identified,  
128 including 15 lncRNAs and 26 mRNAs, which were enriched in cell division, cell  
129 cycle, mitosis, and mitotic cell cycle G/2M transitions. The second module contained  
130 highly expressed genes in 8-cell stage embryos. There were 51 genes in total,  
131 including 25 lncRNAs and 26 mRNAs. Notably, the typical ZSCAN4

132 zygotically-activated genes in mice and humans were in this module. GO enrichment  
133 indicated that genes in the second module were related to protein binding, DNA  
134 binding regulation and GTPase activation. The third module included highly  
135 co-expressed genes of 8-cell stage and morula embryos, and 28 genes were screened,  
136 including 12 lncRNAs and 16 mRNAs. Genes were mainly enriched for transcription  
137 factor activity, transcriptional regulation and transcription-related entries. The second  
138 and third modules were collectively defined as zygotic genes, mainly related to  
139 transcriptional and regulatory pathways.

140

141 **ERV1 exhibits a highly expressed, stage-specific pattern in early goat embryos**  
142 ERVs were the most abundant class of TE in the goat genome in comparison with  
143 bovine, human and mouse genomes (**Table 2, Fig. 2A**). The expression pattern of  
144 TE-derived transcripts in the transcriptome data from each developmental stage of  
145 early goat embryos was analyzed (**Fig. S1**). We found that ERV1s accounted for the  
146 highest proportion in the transcriptome at all stages (the top six TEs expressed) (**Fig.**  
147 **2B**). Moreover, the number of specifically expressed ERV1s significantly increased in  
148 the 8-cell stage embryos when focusing on the ERV1, RTE, and L1 specifically  
149 expressed in embryos at different developmental stages ( $P < 0.01$ ) (**Fig. 2C**). We  
150 aligned transcriptome sequences with TE databases to obtain dynamic expression  
151 levels of transcripts associated with transposon elements. PCA (**Fig. S5A**) and  
152 dynamic expression analysis of all screened stage-specific elements showed that the  
153 TEs (ERV1, L1 and RTE) were stage-specifically expressed during development of  
154 early goat embryos (**Fig. 2D and S5A**). We selected the representative maternal gene  
155 expression element ERV1\_1\_2471 and the zygotic gene expression element  
156 ERV1\_1\_12704 for IGV visualization (**Fig. S5B**), and the sequencing data were  
157 verified by RT-qPCR (**Fig. S5C**). These findings suggested that ERV1s were highly  
158 expressed in early goat embryos and exhibited stage-specific expression patterns.

159

160 **ERV1 has the potential to form virus-like particles (VLPs)**

161 We performed structural predictions on all ERV1s with complete ERV sequences

162 (domains > 2), and found structures typical of overlapping Gag, Pro and Pol genes in  
163 the RNA coding region of ERV1 sequences (**Fig. S6**). We found that the gag protein  
164 structures of ERV1\_1\_574 and ERV1\_1\_1613 had the potential to encode a virus-like  
165 capsid Gag protein domain P10, P24 and P30 that may generate VLPs (**Fig. 3A**). The  
166 expression level of candidate ERV1 in early embryos was verified by RT-qPCR, and  
167 ERV1\_1\_574 and ERV1\_1\_1613 were highly expressed at the eight-cell stage (**Fig.**  
168 **3B**).

169 TEM results revealed a large number of VLPs distributed in the spaces between  
170 blastomeres and in the perivitelline space (**Fig. 4A**). After ERV1\_1\_574 knockdown,  
171 we found that the number of VLPs was significantly decreased both in the space  
172 between blastomeres (**Fig. 4B**) and in the perivitelline space (**Fig. 4C**) in 8-cell stage  
173 embryos ( $P < 0.01$ ). These results showed that ERV1\_1\_574 encoded the Gag protein  
174 domain to form VLPs in goat early embryos.

175

### 176 **ERV1\_1\_574 is necessary for early embryo development**

177 We performed RNAi experiments to verify how ERV1 affected early embryonic  
178 development (**Fig. 5A**). The results showed that silencing of ERV1\_1\_574  
179 significantly reduced the blastocyst development rate, while knockdown of  
180 ERV1\_1\_1613 had no significant effect on embryonic development (**Fig. 5B and C**).  
181 Interestingly, we found that the densification of morula in the ERV1\_1\_574  
182 knockdown group was significantly affected (**Fig. 5D**), and few embryos developed  
183 beyond sixteen cells to the morula or blastocyst stage (**Fig. 5E and F**). We performed  
184 blastocyst quality assessment experiments through CDX2 staining and found that the  
185 total number of blastocyst cells and the number of trophoblast cells in the knockdown  
186 group were significantly reduced ( $P < 0.05$ ), but the number of inner cell masses was  
187 not significantly different (**Fig. 6A and B**). The apoptotic staining experiments  
188 revealed that apoptotic cell numbers in blastocysts were significantly increased in the  
189 knock-down group relative to the controls ( $P < 0.001$ ) (**Fig. 6C and D**).

190

### 191 **ERV1\_1\_574 regulated embryo compaction and trophoblast**

192 **differentiation-related genes**

193 To elucidate the mechanism of ERV1\_1\_574's effect on embryo development at the  
194 gene level, we performed transcriptome sequencing analysis of morula embryos and  
195 obtained 351 differentially expressed transcripts (**Fig.7A**), of which 188 were  
196 upregulated and 163 were downregulated (**Fig. 7B**). KEGG analysis (**Fig.7C**) and GO  
197 enrichment analysis (**Fig.7D**) showed that differential genes were enriched in cell  
198 adhesion, cell junction and other pathways. RT-qPCR was used to validate the  
199 expression levels of the DEGs, CX43 (a connexin-encoding gene) and CDX2 (embryo  
200 lineage differentiation gene), associated with embryo compaction and trophoblast  
201 differentiation. Knockdown of ERV1\_1\_574 significantly decreased the expression of  
202 CX43 and CDX2 in morulas (**Fig.7E**). These results indicated that ERV1\_1\_574  
203 affected embryonic development by regulating the expression of embryo compaction  
204 and trophoblast differentiation-related genes.

205

206 **Discussion**

207 ERVs constitute a large number of TE elements in eukaryotic genomes (Mager &  
208 Stoye, 2015). Systematic elucidation of the expression and function of ERV elements  
209 is useful for revealing the regulatory mechanism of early embryonic development  
210 (Gifford *et al*, 2013; Friedli & Trono, 2015; Hutchins & Pei, 2015). In this study, we  
211 constructed a TE database and comprehensively analyzed the expression patterns of  
212 ERVs during early goat embryo development. We screened ERV1 for its potential to  
213 encode a gag protein and detected the presence of VLPs in goat embryos. We found  
214 that ERV1\_1\_574 knockdown caused the arrest of embryos mostly at the 8- to16-cell  
215 stage; therefore, we explored the possible biological function of ERV1\_1\_574 on  
216 early embryonic development in goats.

217 The subfamily and function of reactivated ERV elements in early embryos were  
218 different among mammal species. In mouse, MuERV-L was an important marker of  
219 zygotic genome activation with important functions in early embryo development and  
220 establishment of pluripotency (Kigami *et al*, 2003; Macfarlan *et al*, 2012). In early  
221 human embryos, HERVH was mainly expressed in the inner cell mass and promoted



222 embryonic stem cells through the encoded lncRNA, HPAT5 (Durruthy-Durruthy *et al*,  
223 2016; Wang *et al*, 2016). ERV1s were highly expressed in early embryos, but their  
224 function and regulation were unclear in bovines (Bui *et al*, 2009). Our results showed  
225 that ERV1\_1\_574 was highly expressed specifically during EGA, and that  
226 ERV1\_1\_574 knockdown significantly reduced embryo compaction and trophoblast  
227 differentiation in goats.

228 ERV elements were involved in regulating gene expression during embryonic  
229 development through various pathways, including promoter/enhancer activity,  
230 non-coding RNA (lncRNA), functional proteins, and epigenetic modification (Chuong  
231 *et al*, 2017; Hendrickson *et al*, 2017). In previous studies, HERV-K LTR was shown  
232 to contain multiple transcriptional start sites (TSS), and alternate TSS were part of the  
233 active regulation of gene transcription directed by LTRs (Fuchs *et al*, 2011; Persson *et*  
234 *al*, 2016). The ERV-derived lncRNA, LincGET, influenced inner cell mass (ICM)  
235 development and induced cell fate decisions (Wang *et al*, 2018). The HERV-W env  
236 protein acted as a fusion protein to promote the formation of syncytiotrophoblast cells  
237 (Frendo *et al*, 2003). HERV-K, which exists in repressed chromatin regions, has a  
238 strong association with H3K9me3 and is able to both activate and suppress gene  
239 expression (Campos-Sánchez *et al*, 2016). Our study found that ERV1\_1\_574 affected  
240 the development of early embryos by regulating the expression of CX43 and CDX2,  
241 which are genes related to embryo compaction and trophoblast differentiation. We  
242 also determined whether ERV-encoded Gag protein could regulate embryonic  
243 development.

244 In recent years, the functions and regulatory mechanisms of various ERV-derived  
245 non-coding RNAs have been unraveled (Gerdes *et al*, 2016); however, less is known  
246 about the function and regulation of Gag proteins encoded by complete ERV  
247 sequences. Previous studies revealed that the complete ERV element, MuERV-L,  
248 could produce Gag protein and form VLPs in 2-cell stage mouse embryos (Macfarlan  
249 *et al*, 2012). In addition, the envelope protein of endogenous Jaagsiekte sheep  
250 retrovirus (enJSRVs) was able to regulate trophectoderm growth and differentiation in  
251 peri-implantation embryos (Dunlap *et al*, 2006). Here, we confirmed the presence of

252 Gag protein VLPs in early goat embryos, and established that ERV1\_1\_574, had the  
253 ability to express Gag protein, and significantly affect the rate of embryo development,  
254 and the rate and quality of blastocyst formation. Whether ERV1\_1\_574 regulated this  
255 process alone, or through Gag proteins, is still under investigation.

256 The Gag proteins produced by ERVs have specific biological functions in placental  
257 development. The Fv1 (Friend virus susceptibility-1) gene, encoded by the mouse  
258 MuERV-L Gag protein gene, can limit infection by the mouse leukemia virus MuLVs  
259 (Sanz-Ramos & Stoye, 2013). In sheep, the Gag protein encoded by enJSRV restricted  
260 the replication of exogenous viruses by blocking their interaction with receptors  
261 (Arnaud *et al*, 2007). Recent studies have shown that VLPs derived from ERVs can  
262 enclose their own RNAs and transmit them between cells, suggesting that virus  
263 particles derived from ERVs are capable of mediating cell communication. During  
264 *Drosophila* oogenesis, transposons were passed from supporting nurse cells to eggs by  
265 means of microtubules to promote oocyte development, proving that transposons can  
266 be passed from cell to cell (Wang *et al*, 2018). In neurons, the Arc gene encodes a  
267 Gag-like protein that forms VLPs, and the Arc gene mRNA is delivered to other  
268 neuronal cells in the form of exosomes (Pastuzyn *et al*, 2018). Additional studies will  
269 need to be done to determine whether the Gag protein encoded by ERV1 can be  
270 assembled into VLPs that can act like exosomes to encapsulate specific RNAs and  
271 pass through the cytomembrane in early goat embryos to mediate communication  
272 between blastomeres.

273 In summary, our study demonstrated that ERV1 had the potential to encode the Gag  
274 protein domain to form VLPs that regulate trophoblast cell differentiation in early  
275 goat embryos. Although only a subset of ERVs has been studied during early  
276 embryonic development, our findings highlight the unexplored functions of ERVs in  
277 regulating embryonic development.

278

## 279 **Materials and Methods**

### 280 **Establishment of goat TE database**

281 According to the latest goat genome data, LAMP (Linux Ubuntu Server 12.04,  
282 Apache 2, MySQL Server 5.5, Perl 5.16.3/ PHP 5.3) was used to construct a database  
283 of TEs from the goat genome. The TE data were stored as MySQL tables. Common  
284 gateway interface (CGI) programs were adapted using Perl, JavaScript and PHP  
285 programming languages. The JBrowse genome browser is an embedded genome  
286 browser produced with HTML5 and JavaScript that was employed to manipulate and  
287 depict the positional relationships between genes and TEs in the goat database  
288 (Skinner et al., 2009). The establishment of the goat TE database was mainly based on  
289 the signature, homology, and Denove methods. Predict LTRs (long terminal repeats),  
290 Helitron MITEs (miniature inverted repeat transposable elements), LINEs (long  
291 interspersed nuclear elements), SINEs (short interspersed nuclear elements), and TIRs  
292 (terminal inverted repeats) were identified. The filter sequence was redundant, and the  
293 filter criterion was identity >90%. LTRs and LINEs were used for superfamily  
294 identification by direct comparison with the Repbase database, and family  
295 identification was based on the 80-80-80 principle for classification. The coverage  
296 and classification of transposon elements in the goat genome was performed using  
297 RepeatMasker (<http://www.repeatmasker.org>, v 4.0.3). The Repbase update collection  
298 was down-loaded from <http://www.girinst.org/rebase/index.html> (Jurka et al., 2005).  
299 The position of the transposon sequence in the genome was obtained by using the  
300 visualization software from UCSC. The Jukes-Cantor step-length was calculated and  
301 the appearance of the evolutionary tree was further edited by Mega v7 (Kumar et al.,  
302 2016). Lastly, the potential active elements in the open reading frame were identified  
303 via CLC sequence Viewer 5 (CLC Bio). The data used in this study was down-loaded  
304 from the goat genome database <https://www.ncbi.nlm.nih.gov/genome/?term=goat>.

305

### 306 **Goat embryo collection and culture**

307 The goat ovaries were collected from an abattoir, placed in saline containing 100  
308 U/ml penicillin/ streptomycin at 20°C, and transported to the lab within six hours. The  
309 organs were washed 3× and incubated in TCM-199 (Gibco-BRL, NY, US) with 25

310 mM HEPES, 10% fetal bovine serum, and 2 IU/mL heparin. Follicles (2-6 mm  
311 diameter) were removed, and cumulus-cell oocyte complexes (COCs) with  
312 intact/dense cumulus cells were removed under a stereo-microscope. After washing  
313 with phosphate-buffered saline, 100 COCs were pipetted into four-well plates and  
314 cultured in maturation medium (TCM-199 supplemented with 10% FBS, 0.2 mM  
315 sodium pyruvate, 0.075 IU/mL human menopausal gonadotropin, 1 µg/mL  
316 17β-estradiol, 10 ng/mL epidermal GF, and 1% insulin/transferrin-selenium) for about  
317 24 hours at 38°C in a CO<sub>2</sub> incubator.  
318 Commercial cryopreserved semen (SKXing Breeding Biotechnology, Inner Mongolia,  
319 China) was employed for fertilization. Fifty microliter sperm aliquots ( $2 \times 10^6$   
320 sperm/mL) were incubated with 40 to 50 COCs in 400 µL BO-IVF medium (IVF  
321 Bioscience, Falmouth, UK). After twelve hours, the COCs were removed and the  
322 zygotes transferred into 400 µL BO-IVC medium (IVF Bioscience, Falmouth, UK)  
323 and layered with mineral oil. Embryos were removed at specific stages for  
324 experiments.

325

### 326 **RNA-seq**

327 The single-cell RNA-seq technology (SUPeR-seq) developed by Tang et al. was  
328 performed to profile the whole transcriptome (Fan et al., 2015). Briefly, the three best  
329 quality embryos at each developmental stage were disrupted in single-cell sequencing  
330 lysis buffer (blastocysts were not used to construct the sequencing library for  
331 technical reasons). RNA was reverse transcribed into cDNA using the T15N6 primers  
332 from the SuperScript III kit. The amplified and purified cDNA product was sheared  
333 into 150-350 bp fragments by Covaris S2. Fragmented DNA was amplified using the  
334 TruSeq DNA library building kit. All libraries were sequenced on an Illumina  
335 platform to generate the raw data. Approximately 11.4 million reads were obtained  
336 per sample.

337 The sequencing data were filtered with SOAPnuke (v1.5.2) (Li et al., 2008), and clean  
338 reads were mapped to the goat assembly ARS1 genome using HISAT2 (v2.0.4) (Kim  
339 et al., 2015). Transcripts were assembled by StringTie (Pertea et al., 2015) to generate

340 novel, known transcripts. Fragments per gene were counted using HTSeq-count  
341 (version 0.12.4) (PMID: 25260700) from aligned reads. Fragments per kb of exon  
342 model per million mapped fragments (FPKM) were determined using DESeq2 (v1.4.5)  
343 (Love et al., 2014) after data normalization. To compare expression of genes between  
344 different developmental stages, normalization of reads coverage and differential gene  
345 expression analysis at the different developmental stages were performed using  
346 DESeq2. The threshold of differential expressed genes was  $P < 0.05$ ,  $|\text{fold change}| > 1$ .

347

#### 348 **Analysis of the source transcripts of TEs**

349 Protein-based RepeatMasking in Repeatmasker was used to compare the  
350 transcriptome sequence with all transposon element libraries and obtain dynamic  
351 expression levels of transcripts related to transposon elements.

352

#### 353 **Predictive analysis of ERV1 domains**

354 GenomeTools 1.5.7 was used to analyze the structure of ERV1 and to predict the  
355 structure of ERV1 with domains  $>3$ .

356

#### 357 **RT-qPCR**

358 Embryos at the zygotic, two-, four-, and eight-cell stages, and morulae were harvested,  
359 respectively, at 1, 2, 3, and 5 days after fertilization or activation on day 0. The  
360 PrimeScript<sup>TM</sup> RT reagent kit with gDNA eraser (Takara) was used to convert total  
361 RNA to cDNA. SYBR<sup>®</sup> Premix Ex Taq<sup>TM</sup> II and a one-step real-time PCR system  
362 (Applied Biosystems) was used to do reverse-transcription quantitative PCR  
363 (RT-qPCR). The primer sequences are shown in Table 3, and data are compared as  
364 fold-change =  $2^{-\Delta\Delta C_t}$  means  $\pm$  SD.

365

#### 366 **Embryonic RNA interference (RNAi)**

367 The siRNA against the sheep ERV1\_1\_574 transcript was created and synthesized by  
368 GenePharma (Shanghai, China) (Table 4). The siRNA was aliquotted at 20  $\mu$ M and  
369 kept at  $\square$ 80°C. About 10 pL of siRNA was injected into a presumed fertilized egg

370 (collected 20 hours after IVF). The siRNA was microinjected under a microscope  
371 (Axio Observer D1, Zeiss) equipped with a micro-manipulation device (TransferMan  
372 NK2, Eppendorf) and a micro-injector (FemtoJet, Eppendorf). A volume of 1  $\mu$ L of  
373 siRNA was drawn from the bottom of the tube through a micro-sampler (Eppendorf).  
374 During microinjection, the embryo was inside a 100  $\mu$ L droplet of M199/HEPES  
375 (Gibco) plus 10% fetal bovine serum.

376

### 377 **Differential staining and apoptosis analysis of early embryonic cells**

378 Experimentally treated blastocysts and control blastocysts were collected on day 7,  
379 fixed with 4% paraformaldehyde at room temperature for 4 hours, and permeabilized  
380 with 0.1% Triton X-100 at room temperature for 20 minutes. The blastocysts were  
381 blocked in immunostaining blocking medium at 4°C overnight followed by  
382 incubation with anti-CDX2 (BioGenex Inc., US) at 4°C overnight. After washing, the  
383 blastocysts were incubated with AlexaFluor 555-conjugated donkey anti-mouse IgG  
384 for 2 h in the dark at room temperature. After washing again, the nuclei in the samples  
385 were stained with DAPI (Beyotime, China) and the stained cells were imaged under a  
386 fluorescence microscope. The total number of blastocyst cells, trophoblast cells and  
387 inner cell clusters were counted.

388 Another group of blastocysts was collected for measuring apoptosis. After fixing and  
389 permeabilization, the blastocysts were transferred to a solution of 45  $\mu$ L of E-buffer, 5  
390  $\mu$ L dNTP Nad mix, and 1  $\mu$ L rTdT, and incubated at 37°C in the dark for 1 hour.

391 Reactions were terminated by addition of 2X SSC, nuclei were stained with DAPI,  
392 and apoptosis was observed under a fluorescence microscope. The total number of  
393 blastocyst cells (DAPI) and apoptotic cells (FITC) were counted and the apoptosis  
394 rate was determined. The TUNEL assay kit used in the experiment was from Promega  
395 Corporation.

396

### 397 **Transmission electron microscopy**

398 Eight-cell stage embryos were fixed with 2.5% glutaraldehyde for 1 hour at 4°C. The  
399 agar embedding method was used to embed 30-40 embryos in a 2 mm x 2 mm x 2

400 mm agar block. The agar blocks were rinsed three times with 0.1 M phosphate buffer,  
401 fixed with 1% osmic acid solution for 2-4 h, then dehydrated twice in graded ethanol  
402 solutions: 30%, 50%, 70%, 80%, 90%, and 100%. Samples in 100% ethanol were  
403 immersed in LR-White embedding agent (3:1) for 2 h, 1:1 for 8h, 1:3 for 12 h, and  
404 lastly, 100% LR-White for 24 h, overnight. The samples were placed in the  
405 embedding polymerizer for automatic polymerization and then sectioned, first as  
406 semi-thin sections and, after positioning, as ultra-thin sections. The ultra-thin sections  
407 were floated onto copper meshes, stained with uranyl acetate, then with lead citrate,  
408 dried naturally and observed under a transmission electron microscope.

409

#### 410 **Analysis of ERV1 expression interference by embryonic gene expression**

411 Heatmaps of the various samples were constructed using P-heatmap (v1.0.8) based on  
412 gene-expression profiles. Differential expression was determined using DESeq2  
413 (v1.4.5) (Fan et al., 2015) with  $q$  value  $\leq 0.05$ . For additional insights into the changes  
414 of phenotypes, GO (<http://www.geneontology.org/>) and KEGG (<https://www.kegg.jp/>)  
415 enrichment analysis of annotated DEGs was done using the P-hyper package  
416 ([https://en.wikipedia.org/wiki/Hypergeometric\\_distribution](https://en.wikipedia.org/wiki/Hypergeometric_distribution)) based on the  
417 hypergeometric test. The significance levels of terms and pathways were corrected  
418 according to  $q$  values with a strict threshold of  $q \leq 0.05$ , using the Bonferroni test.

419

#### 420 **Statistical analysis**

421 Appropriate statistics tests were performed using SPSS 22.0 (SPSS Inc., US).  
422 Experiments were repeated at least three times, and data are means  $\pm$  standard error of  
423 the mean (SEM). For RT-qPCR, the value of  $2^{-\Delta\Delta Ct}$  was measured to compare the  
424 relative gene expression of experimental with control groups. Student's  $t$  test or  
425 Chi-squared test was used for paired comparison, and one-way analysis of variance  
426 was done for multiple comparisons.  $P < 0.05$  indicated significance

427

#### 428 **Compliance and ethics**

429 All animal procedures and experiments were conducted in accordance with the Guide  
430 for the Care and Use of Laboratory Animals (Ministry of Science and Technology of  
431 China, 2006), and were approved by the animal ethics committee of Northwest A&F  
432 University.

433

#### 434 **Acknowledgments**

435 We thank Ronghua Zhang for providing the goat ovaries.

436

#### 437 **Author contributions**

438 Wenjing Li: Data curation, Methodology, Formal analysis, Writing. Shujuan Liu:  
439 Methodology, Formal analysis. Jianglin Zhao: Methodology, Formal analysis. Ruizhi  
440 Deng: Methodology, Formal analysis. Yayi Liu: Methodology, Resources. Huijia Li:  
441 Methodology, Resources. Hongwei Ma: Methodology, Resources. Yanzhi Chen:  
442 Writing. Jingcheng Zhang: Methodology, Resources. Yongsheng Wang: Methodology,  
443 Resources. Jianmin Su: Methodology, Resources. Fusheng Quan: Methodology,  
444 Resources. Yong Zhang: Project administration, Xu liu and Yan Luo:  
445 Conceptualization. Jun Liu: Conceptualization, Writing, Funding acquisition.

446

#### 447 **Competing interests**

448 The authors declare that they have no conflict of interest.

449

#### 450 **References**

451 Adelson DL, Raison JM, Edgar RC (2009) Characterization and distribution of  
452 retrotransposons and simple sequence repeats in the bovine genome. *Proc Natl Acad*  
453 *Sci U S A* 106: 12855-12860  
454 Arnaud F, Murcia PR, Palmarini M (2007) Mechanisms of late restriction induced by  
455 an endogenous retrovirus. *J Virol* 81: 11441-11451  
456 Beraldi R, Pittoggi C, Sciamanna I, Mattei E, Spadafora C (2006) Expression of  
457 LINE-1 retroposons is essential for murine preimplantation development. *Mol Reprod*  
458 *Dev* 73: 279-287



459 Bui LC, Evsikov AV, Khan DR, Archilla C, Peynot N, Hénaut A, Le Bourhis D,  
460 Vignon X, Renard JP, Duranthon V (2009) Retrotransposon expression as a defining  
461 event of genome reprogramming in fertilized and cloned bovine embryos. *Reproduction*  
462 138: 289-299

463 Campos-Sánchez R, Cremona MA, Pini A, Chiaromonte F, Makova KD (2016)  
464 Integration and fixation preferences of human and mouse endogenous retroviruses  
465 uncovered with functional data analysis. *Plos Comput Biol* 12: e1004956

466 Chuong EB, Elde NC, Feschotte C (2017) Regulatory activities of transposable  
467 elements: From conflicts to benefits. *Nat Rev Genet* 18: 71-86

468 Deng R, Han C, Zhao L, Zhang Q, Yan B, Cheng R, Wei B, Meng P, Mao T, Zhang Y  
469 et al (2019) Identification and characterization of ERV transcripts in goat embryos.  
470 *Reproduction* 157: 115-126

471 Dunlap KA, Palmarini M, Varela M, Burghardt RC, Hayashi K, Farmer JL, Spencer  
472 TE (2006) Endogenous retroviruses regulate periimplantation placental growth and  
473 differentiation. *Proc Natl Acad Sci U S A* 103: 14390-14395

474 Durruthy-Durruthy J, Sebastiano V, Wossidlo M, Cepeda D, Cui J, Grow EJ, Davila J,  
475 Mall M, Wong WH, Wysocka J et al (2016) The primate-specific noncoding RNA  
476 HPAT5 regulates pluripotency during human preimplantation development and  
477 nuclear reprogramming. *Nat Genet* 48: 44-52

478 Frendo JL, Olivier D, Cheynet V, Blond JL, Bouton O, Vidaud M, Rabreau M,  
479 Evain-Brion D, Mallet F (2003) Direct involvement of HERV-W Env glycoprotein in  
480 human trophoblast cell fusion and differentiation. *Mol Cell Biol* 23: 3566-3574

481 Friedli M, Trono D (2015) The developmental control of transposable elements and  
482 the evolution of higher species. *Annu Rev Cell Dev Bi* 31: 429-451

483 Fu B, Ma H, Liu D (2019) Endogenous retroviruses function as gene expression  
484 regulatory elements during mammalian pre-implantation embryo development. *Int J*  
485 *Mol Sci* 20: 790

486 Fuchs NV, Kraft M, Tondera C, Hanschmann KM, Lower J, Lower R (2011)  
487 Expression of the human endogenous retrovirus (HERV) group HML-2/HERV-K does  
488 not depend on canonical promoter elements but is regulated by transcription factors

489 sp1 and sp3. *J Virol* 85: 3436-3448

490 Gerdes P, Richardson SR, Mager DL, Faulkner GJ (2016) Transposable elements in  
491 the mammalian embryo: Pioneers surviving through stealth and service. *Genome Biol*  
492 17: 100

493 Gifford WD, Pfaff SL, Macfarlan TS (2013) Transposable elements as genetic  
494 regulatory substrates in early development. *Trends Cell Biol* 23: 218-226

495 Hendrickson PG, Dorais JA, Grow EJ, Whiddon JL, Lim JW, Wike CL, Weaver BD,  
496 Pflueger C, Emery BR, Wilcox AL et al (2017) Conserved roles of mouse DUX and  
497 human DUX4 in activating cleavage-stage genes and MERVL/HERVL  
498 retrotransposons. *Nat Genet* 49: 925-934

499 Hutchins AP, Pei D (2015) Transposable elements at the center of the crossroads  
500 between embryogenesis, embryonic stem cells, reprogramming, and long non-coding  
501 RNAs. *Sci Bull* 60: 1722-1733

502 Kigami D, Minami N, Takayama H, Imai H (2003) MuERV-L is one of the earliest  
503 transcribed genes in mouse One-Cell embryos I. *Biol Reprod* 68: 651-654

504 Lander ES, Linton LM, Birren B, Nusbaum C, Zody MC, Baldwin J, Devon K,  
505 Dewar K, Doyle M, Fitzhugh W et al (2001) Initial sequencing and analysis of the  
506 human genome. *Nature* 409: 860-921

507 Macfarlan TS, Gifford WD, Driscoll S, Lettieri K, Rowe HM, Bonanomi D, Firth A,  
508 Singer O, Trono D, Pfaff SL (2012) Embryonic stem cell potency fluctuates with  
509 endogenous retrovirus activity. *Nature* 487: 57-63

510 Mager DL, Stoye JP (2015) Mammalian endogenous retroviruses. *Microbiol Spectr* 3:  
511 A3-A9

512 Makalowski W, Pande A, Gotea V, Makalowska I (2012) Transposable elements and  
513 their identification. *Methods Mol Biol* 855: 337-359

514 Pastuzyn ED, Day CE, Kearns RB, Kyrke-Smith M, Taibi AV, McCormick J, Yoder N,  
515 Belnap DM, Erlendsson S, Morado DR et al (2018) The neuronal gene arc encodes a  
516 repurposed retrotransposon gag protein that mediates intercellular RNA transfer. *Cell*  
517 172: 275-288

518 Persson J, Steglich B, Smialowska A, Boyd M, Bornholdt J, Andersson R, Schurra C,

519 Arcangioli B, Sandelin A, Nielsen O et al (2016) Regulating retrotransposon activity  
520 through the use of alternative transcription start sites. *Embo Rep* 17: 753-768

521 Platt RN, Vandewege MW, Ray DA (2018) Mammalian transposable elements and  
522 their impacts on genome evolution. *Chromosome Res* 26: 25-43

523 Rebollo R, Romanish MT, Mager DL (2012) Transposable elements: An abundant and  
524 natural source of regulatory sequences for host genes. *Annu Rev Genet* 46: 21-42

525 Rho M, Tang H (2009) MGEScan-non-LTR: Computational identification and  
526 classification of autonomous non-LTR retrotransposons in eukaryotic genomes.  
527 *Nucleic Acids Res* 37: e143

528 Sanz-Ramos M, Stoye JP (2013) Capsid-binding retrovirus restriction factors:  
529 Discovery, restriction specificity and implications for the development of novel  
530 therapeutics. *J Gen Virol* 94: 2587-2598

531 Senft AD, Macfarlan TS (2021) Transposable elements shape the evolution of  
532 mammalian development. *Nat Rev Genet* 22: 691-711

533 Thompson PJ, Macfarlan TS, Lorincz MC (2016) Long terminal repeats: From  
534 parasitic elements to building blocks of the transcriptional regulatory repertoire. *Mol*  
535 *Cell* 62: 766-776

536 Wang J, Li X, Wang L, Li J, Zhao Y, Bou G, Li Y, Jiao G, Shen X, Wei R et al (2016)  
537 A novel long intergenic noncoding RNA indispensable for the cleavage of mouse  
538 two-cell embryos. *Embo Rep* 17: 1452-1470

539 Wang J, Singh M, Sun C, Besser D, Prigione A, Ivics Z, Hurst LD, Izsvák Z (2016)  
540 Isolation and cultivation of naive-like human pluripotent stem cells based on HERVH  
541 expression. *Nat Protoc* 11: 327-346

542 Wang J, Wang L, Feng G, Wang Y, Li Y, Li X, Liu C, Jiao G, Huang C, Shi J et al  
543 (2018) Asymmetric expression of LincGET biases cell fate in Two-Cell mouse  
544 embryos. *Cell* 175: 1887-1901

545 Wang L, Dou K, Moon S, Tan FJ, Zhang ZZ (2018) Hijacking oogenesis enables  
546 massive propagation of LINE and retroviral transposons. *Cell* 174: 1082-1094

547 Waterston RH, Lindblad-Toh K, Birney E, Rogers J, Abril JF, Agarwal P, Agarwala R,  
548 Ainscough R, Alexandersson M, An P et al (2002) Initial sequencing and comparative

549 analysis of the mouse genome. *Nature* 420: 520-562

550 Xu Z, Wang H (2007) LTR\_FINDER: An efficient tool for the prediction of

551 full-length LTR retrotransposons. *Nucleic Acids Res* 35: W265-W268

552

553 **Figure legends**

554

555 **Figure 1** Transcriptome dynamics in early goat embryos

556 **(A)** Microscopy images of goat pre-implantation embryos at zygote, two-, four-, and  
557 eight-cell stages, morulae and blastocysts. Scale bar=20  $\mu\text{m}$ . **(B)** The mRNA and  
558 lncRNA expression patterns during goat preimplantation development. **(C)**  
559 Hierarchical clustering analysis shows stage-specific ( $|\text{fold change}| > 2, P < 0.05$ )  
560 expression of genes in goat preimplantation embryo samples. Differentially-expressed  
561 genes (DEGs) were appropriately aggregated into different clusters. Red: high  
562 expression. Blue: low expression. **(D)** Cluster analysis of DEGs. Clusters of DEGs by  
563 normalized FPKM reflect the total transcript content per sample during  
564 preimplantation development. All of the genes shown were differentially expressed  
565 between two consecutive stages ( $|\text{fold change}| > 2, P < 0.05$ ). The DEGs can be  
566 classified as follows: (1) 42 maternal genes with two to three clusters activated in the  
567 8-cell stage defined as zygotic genes; (2) 51 zygotic genes, and (3) 29 zygotic genes.  
568 The expression level is shown in the middle panel and GO enrichment is shown in the  
569 right panel.

570

571 **Figure 2** ERV1 is a specific element in goat TE-derived transcripts

572 **(A)** The proportion of TEs in genomes of different species. **(B)** Relative abundance of  
573 TEs at different developmental stages. Relative abundance of transcripts were derived  
574 from the first six classes of repetitive elements at the indicated stages. **(C)** The  
575 number of ERV1s, RTEs and L1s specifically expressed at different stages compared  
576 to other stages. **(D)** Dynamic expression of ERV1, L1 and RTE elements at different  
577 stages.

578

579 **Figure 3** ERV1 has the potential to encode the Gag protein viral capsid

580 **(A)** ERV1\_1\_574 and ERV1\_1\_1613 have Gag and LTR structures at both ends,  
581 where Gag\_P24 is the core capsid protein. **(B)** Quantitative PCR (qPCR) analysis of  
582 ERV1\_1\_574 and ERV1\_1\_1613 expression levels in in vitro-fertilized embryos at

583 various stages. Error bars indicate SEM.

584

585 **Figure 4** There are a large number of ERV1-derived virus-like particles in early  
586 embryos

587 (A) Electron micrographs of Gag particles from the 8-cell stage of goat embryos.

588 Virions appear mainly in the blastomere space and between the blastomere and the

589 zona pellucida. Arrows: Gag particles; stars: zona pellucida. Scale bar: 200 nm. (B)

590 The number of Gag particles in the blastomere space. Error bars, SEM.  $**P < 0.01$ . (C)

591 Number of Gag particles in the gap between blastomere and zona pellucida. Error bars,

592 SEM.  $**P < 0.01$ .

593

594 **Figure 5** Knockdown of ERV1\_1\_574 affects early embryonic development

595 (A) Expression of ERV1\_1\_574 and ERV1\_1\_1613 at the 8- to 16-cell stage of IVF

596 embryos developed from siRNA/C-injected zygotes. Error bars = SEM.  $*P < 0.05$ ,

597  $**P < 0.01$ . (B) Representative images of control embryos and those siRNA-injected

598 as blastocysts. Scale bar = 100  $\mu\text{m}$ . (C) Development rate of the cleavage and

599 blastocysts in siRNA/C-injected embryos. Error bars = SEM.  $*P < 0.05$ ;  $**P < 0.01$ .

600 (D) Degree and morphology of morula densification in siRNA/C-injected embryos.

601 Scale bar = 20  $\mu\text{m}$ . (E) Development rate of cleavage, 8- to 16-cell stage, morula and

602 blastocysts in embryos. Error bars = SEM.  $*P < 0.05$ ;  $**P < 0.01$ . (F) Developmental

603 embryonic progression after siRNA/C injections.  $\chi^2$  P values were calculated for the

604 developmental rate of embryos injected with siRNA.

605

606 **Figure 6** Knockdown of ERV1\_1\_574 affects blastocyst quality

607 (A) Staining for CDX2 (*red*) and DAPI (*blue*) in blastocysts developing from

608 siRNA/C-injected zygotes. Scale bar = 15  $\mu\text{m}$ . (B) Box plots show total cell numbers,

609 TE cell numbers and ICM cell numbers of goat blastocysts from siRNA/C-injected

610 zygotes.  $*P < 0.05$  (Student's *t* test). (C) Apoptotic cells (*green*) showing nuclei (*blue*)

611 of blastocysts developing from siRNA/C-injected zygotes. Scale bar = 15  $\mu\text{m}$ . (D)

612 Box plots indicate the apoptotic cell number (TUNEL-positive) of goat blastocysts

613 from the siRNA/C-injected zygotes.  $**P < 0.01$  (Student's *t* test).

614

615 **Figure 7** Influence of ERV1\_1\_574 on embryo densification is related to gap-junction  
616 protein

617 **(A)** Hierarchical clustering analysis of 351 differentially expressed lncRNAs and  
618 mRNAs between the control group and the knockdown group at the morula stage.

619 Data are from FPKM. Red: high expression. Blue: low expression. **(B)** Compared  
620 with the knockdown group, 188 genes were upregulated and 163 genes were

621 downregulated in the control group. **(C)** KEGG pathway terms are displayed for 351

622 DEGs in morulae of IVF embryos following siRNA/C microinjections. **(D)** GO

623 analysis of DEGs in morulae of IVF embryos following siRNA/C microinjections. **(E)**

624 Expression of CX43 and CDX2 in morulae of in vitro-fertilized embryos developed

625 from siRNA/C-injected zygotes. Error bars indicate SEM.  $**P < 0.01$ .

626

## 627 **Tables legends**

628

629 Table 1 The TEs identified in the goat genome

630 Table 2 Proportion of TEs in goat genome compared with cattle, human and mouse

631 Table 3 Number of mRNAs and lncRNAs in goat transcriptome

632 Table 4 siRNA sequences for RNA interference

633 Table 5 Primer sequences for RT-qPCR

634

635 **Supplementary Data Legends**

636

637 **Figure S1** Flow chart of TE-derived transcripts

638 Left: flow chart of complete TEs. A total of 495,065 complete TEs were identified  
639 based on three methods (*ab initio* prediction, structure prediction and homology  
640 prediction strategy). All TEs were classified into 21 superfamilies by comparing the  
641 custom repeat library with the Repbase. According to the 80-80-80 rule, all putative  
642 goat TEs were classified into 926 families. Right: lncRNA and mRNA discovery for  
643 RNA-Seq. Bottom, TE-derived transcripts. We used Blastall to blast lncRNA and  
644 mRNA with complete TEs.

645

646 **Figure S2** User interface for browsing in GOAT-TEdb

647 (A) Menu of GOAT-TEdb. (B-D) Browsing interface of database GOAT-TEdb.

648

649 **Figure S3** Chromosomal distribution and maximum likelihood trees of TEs

650 (A) Location of goat TEs in the genome. The x axis corresponds to the chromosomes,  
651 the y axis to nucleotide coordinates in million base-pairs (Mbp) in the goat genome.  
652 (B) Intact RTE, L1 and ERV trees. Maximum likelihood trees derived from global  
653 alignments of all intact/full-length LINES and ERV sequences. Red lines depict  
654 potentially active LINES or ERVs based on their ORF content.

655

656 **Figure S4** Sample correlation analysis

657 (A) Correlation of single-cell goat sequencing samples. Principal-component analysis  
658 of the transcriptomes of single embryos during preimplantation development. (B)  
659 Pearson correlation-coefficient heatmap of single embryo transcriptomes during  
660 preimplantation development.

661

662 **Figure S5.** Stage-specific TE expression during early goat embryonic development

663 (A) PCA of ERV1, LINE1 and RTE expression estimates in pre-implantation goat  
664 embryos. The TEs showing the largest variation between the stages were chosen.



665 ERV1, LINE1 and RTE expression are representative of the different development  
666 stages. (B) Normalized RNA-seq for two loci showing stage-specific ERV1  
667 expression (ERV1\_1\_2471 and ERV1\_1\_12704). (C) Expression profile of  
668 ERV1\_1\_2471 and ERV1\_1\_12704.  $\beta$ -actin was used as a control. Error bars = SEM.

669

670 **Figure S6** Structural features of ERV sequences

671 Gag, Pol and Pro indicate ERV repeat regions.

672

673 **Table 1 The TEs identified in the goat genome**

| Class            | Order    | Super-family  | Member no. | Family no. |
|------------------|----------|---------------|------------|------------|
| Retrotransposons | LTR      | SINE          | 461,901    | 56         |
|                  |          | Copia         | 127        | 5          |
|                  |          | DIRS          | 14         | 13         |
|                  |          | ERV1          | 12,366     | 8          |
|                  |          | ERV4          | 1          | 1          |
|                  |          | ERVK          | 3,332      | 6          |
|                  |          | ERVL          | 272        | 46         |
|                  |          | Gypsy         | 1,816      | 49         |
|                  |          | Pao           | 187        | 6          |
|                  | LINE     | CR1           | 5          | 5          |
|                  |          | I             | 3          | 1          |
|                  |          | L1            | 835        | 12         |
|                  |          | L2            | 3          | 3          |
|                  |          | RTE           | 2,179      | 1          |
| DNA transposons  | TIR      | CMC           | 1          | 1          |
|                  |          | hAT           | 171        | 165        |
|                  |          | PIF-Harbinger | 5          | 5          |
|                  |          | TcMar         | 113        | 100        |
|                  |          | Unknown       | 9,256      | 166        |
|                  | MITE     | MITE          | 15         | 15         |
|                  | Helitron | Helitron      | 2463       | 262        |
| Total            |          |               | 495,065    | 926        |

675 **Table 2 Proportion of TEs in goat genome compared with cattle, human and**  
 676 **mouse**

| Group               | No.    | Total bp      | Capra<br>hircus% | Bos<br>taurus% | Huma<br>n% | Mous<br>e% |
|---------------------|--------|---------------|------------------|----------------|------------|------------|
| Non-LTR             |        |               |                  |                |            |            |
| retrotransposons    |        |               |                  |                |            |            |
| (LINEs)             |        |               |                  |                |            |            |
| L1                  | 835    | 44,127,212    | 1.50975          | 11.26352       | 17.07      | 19.14      |
| RTE (BovB)          | 2179   | 257,153,877   | 8.79816          | 10.74072       | NA         | 0.02       |
| L2                  | 3      | 30,383        | 0.00104          | 1.18416        | 3.07       | 0.37       |
| CR1                 | 5      | 74,331        | 0.00254          | 0.10569        | 0.27       | 0.06       |
| Total               | 3022   | 301,385,803   | 10.31149         | 23.29409       | 20.40      | 19.59      |
| SINEs               |        |               |                  |                |            |            |
| BOVA                | 78     | 17,751        | 0.0006           | 14.2722        | NA         | NA         |
| MIR                 | 1      | 169           | 0.00             | 1.39034        | 2.43       | 0.05       |
| other               | 13     | 1,277         | 0.00             | 0.01482        | 10.68      | 6.78       |
| tRNA                | 461809 | 83,476,435    | 2.856            | 1.98705        | NA         | 0.00       |
| ERVs                | 16880  | 831,540,291   | 28.44999         | 3.19961        | 8.56       | 9.84       |
| DNA transposons     | 2794   | 86,201,828    | 2.94928          | 1.95882        | 3.00       | 0.89       |
| LTR other           | 2149   | 301,385,803   | 1.75835          | 0.42480        | 0.00       | 0.01       |
| Interspersed repeat | 486746 | 1,604,009,357 | 46.3258          | 46.54174       | 45.08      | 37.65      |
| total               |        |               |                  |                |            |            |

678 **Table 3 Number of mRNAs and lncRNAs in goat transcriptome**

| Group  | Known  | New   | All    | Known  | New    | All    |
|--------|--------|-------|--------|--------|--------|--------|
| name   | mRNA   | mRNA  | mRNA   | lncRNA | lncRNA | lncRNA |
|        | Num    | Num   | Num    | Num    | Num    | Num    |
| Zygote | 12,407 | 6,895 | 19,302 | 247    | 1,862  | 2,109  |
| 2cell  | 13,701 | 7,380 | 21,081 | 291    | 2,239  | 2,530  |
| 4cell  | 15,444 | 7,912 | 23,356 | 355    | 2,596  | 2,951  |
| 8cell  | 10,934 | 5,775 | 16,709 | 234    | 1,103  | 1,337  |
| Morula | 13,246 | 6,366 | 19,612 | 357    | 1,094  | 1,451  |

679

680

681 **Table 4 siRNA sequences for RNA interference**

| Gene             | Sequence (5'-3')         |
|------------------|--------------------------|
| $\beta$ -actin-F | CTGGGACGACATGGAGAAGATC   |
| $\beta$ -actin-R | GCAGGGGTGTTGAAGGTCTC     |
| ERV1_1_574-F     | GCAGAGGTGGAGCAGAAGGTT    |
| ERV1_1_574-R     | CAGATGAGGCGGAATTAGACGA   |
| ERV1_1_1613-F    | GCTTTCTAGTCGCACGATACCA   |
| ERV1_1_1613-R    | GGCTTTAACCCTCACAGTCTTGTT |
| CX43_F           | TTGGAGGTGGTACTCAACAGC    |
| CX43_R           | TGGACCACCTAATGCAACCTT    |
| CDX2_F           | GGAACCTGTGCGAGTGGATG     |
| CDX2_R           | TCTGCGGTTCTGAAACCAAAT    |

682

683

684 **Table 5 Primer sequences for RT-qPCR**

| siRNA ID           | Target sequences      |
|--------------------|-----------------------|
| ERV1_1_574-siRNA1  | GGGUCCAAUAUCAGCACAATT |
| ERV1_1_574-siRNA2  | CCGUAUUGUGAGCAAGCAATT |
| ERV1_1_574-siRNA3  | GGUUCCGGAUCAGGAACAUTT |
| ERV1_1_1613-siRNA1 | GGACAUUCUUUGGCCCAAUTT |
| ERV1_1_1613-siRNA2 | GCGCAAUUGGCACUCCUUUTT |
| ERV1_1_1613-siRNA3 | GGCCAAUAUUGAUGAGUUUTT |

685

686 **Fig.1**

**A**

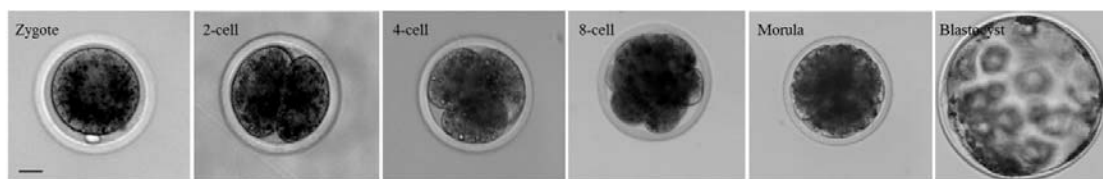

**B**

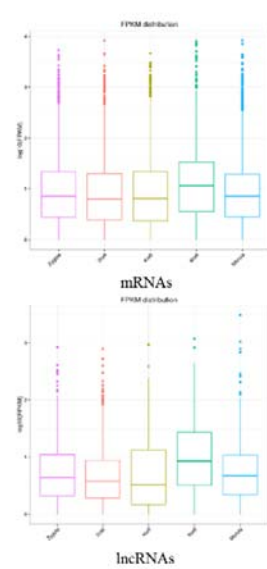

**C**

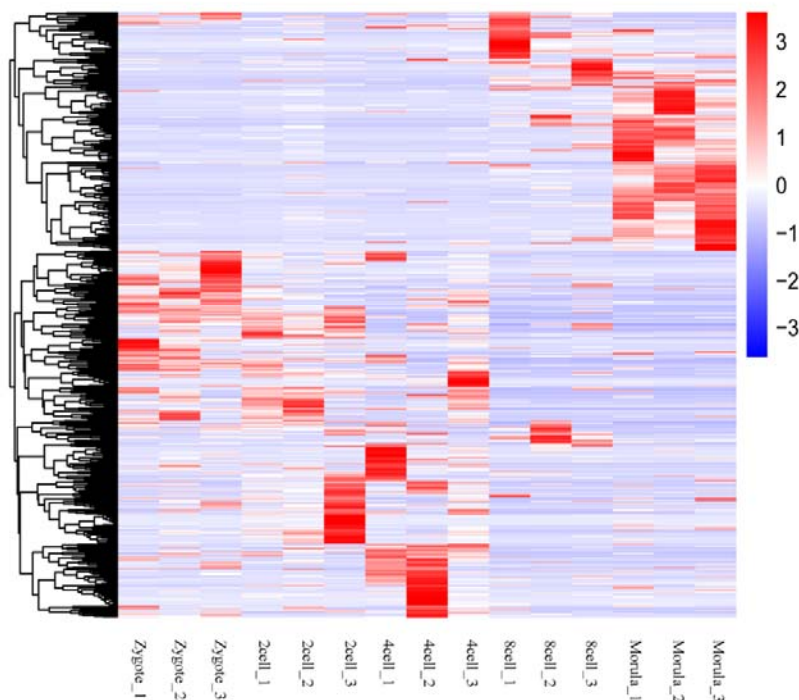

**D**

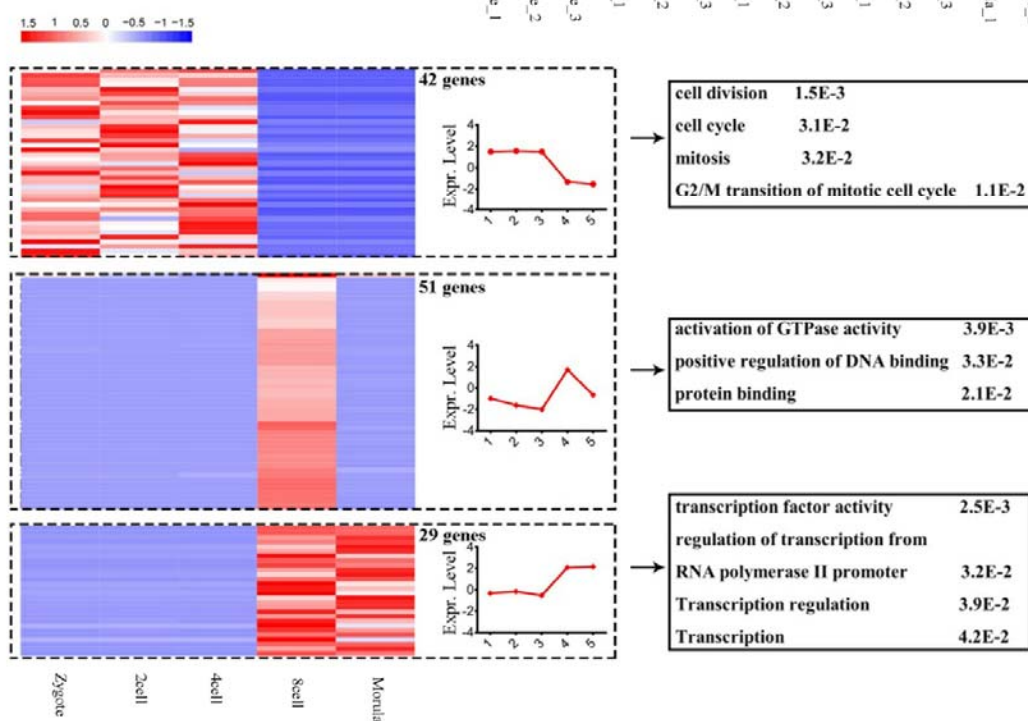

687 **Fig.2**

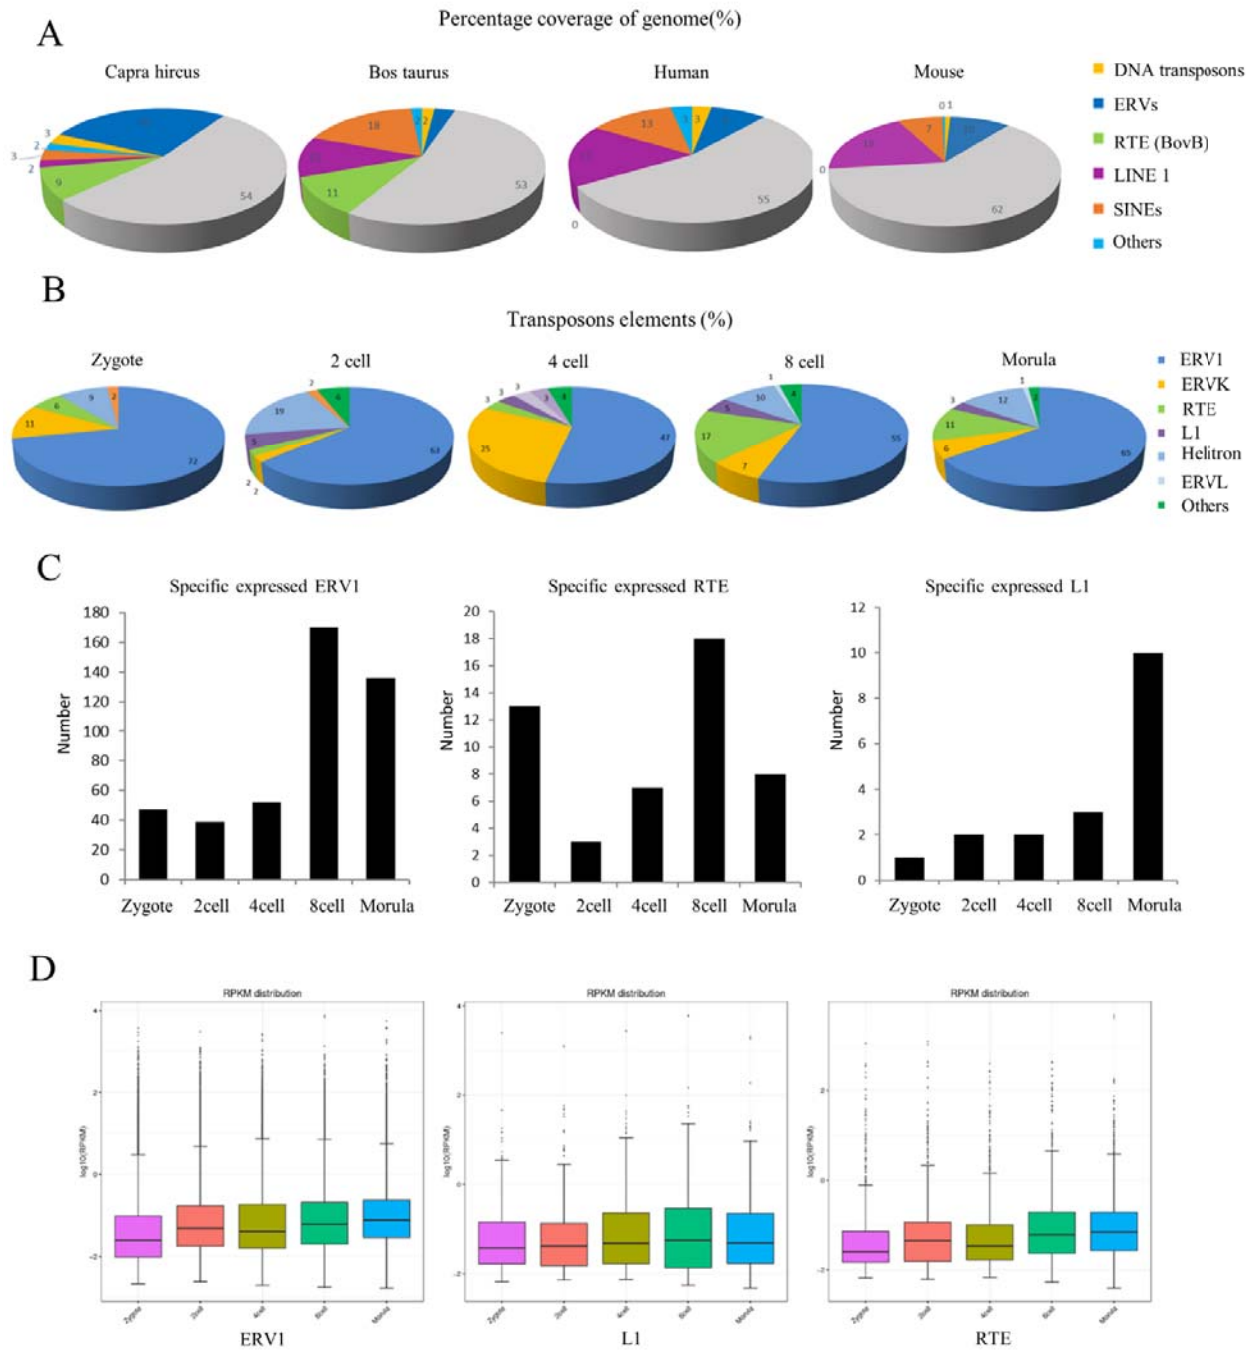



689 Fig.3

A

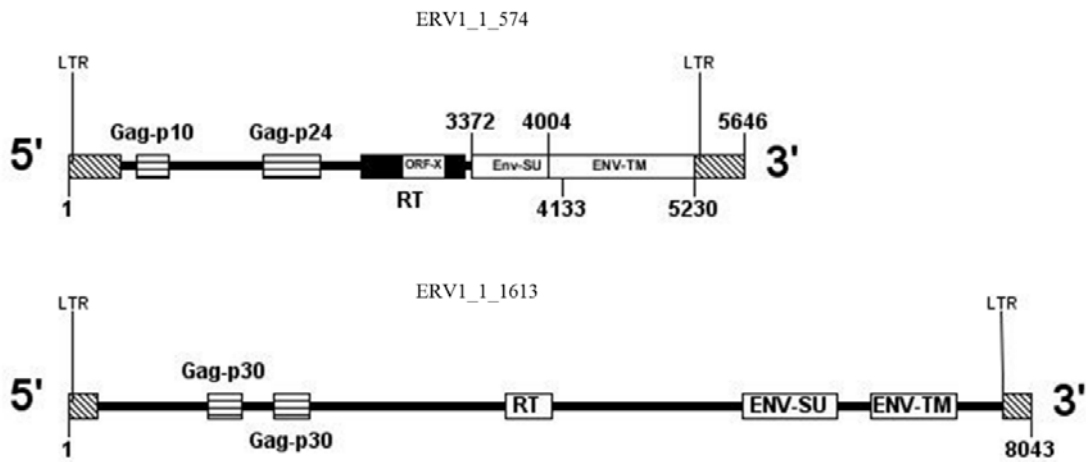

B

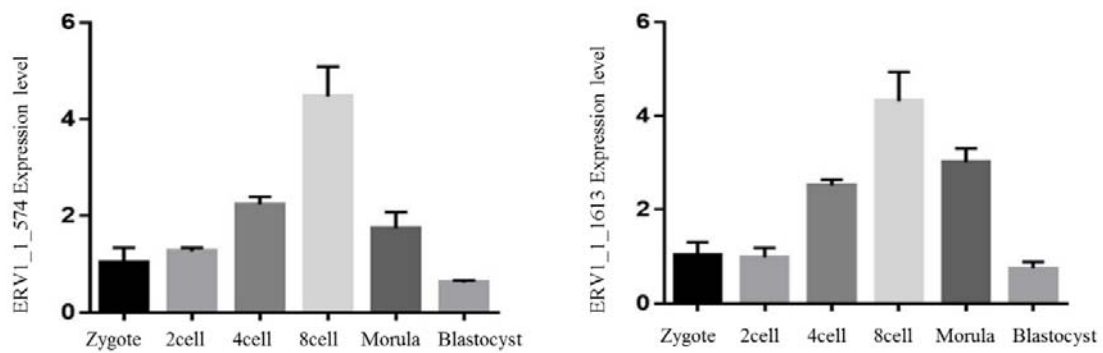

690

691 **Fig.4**

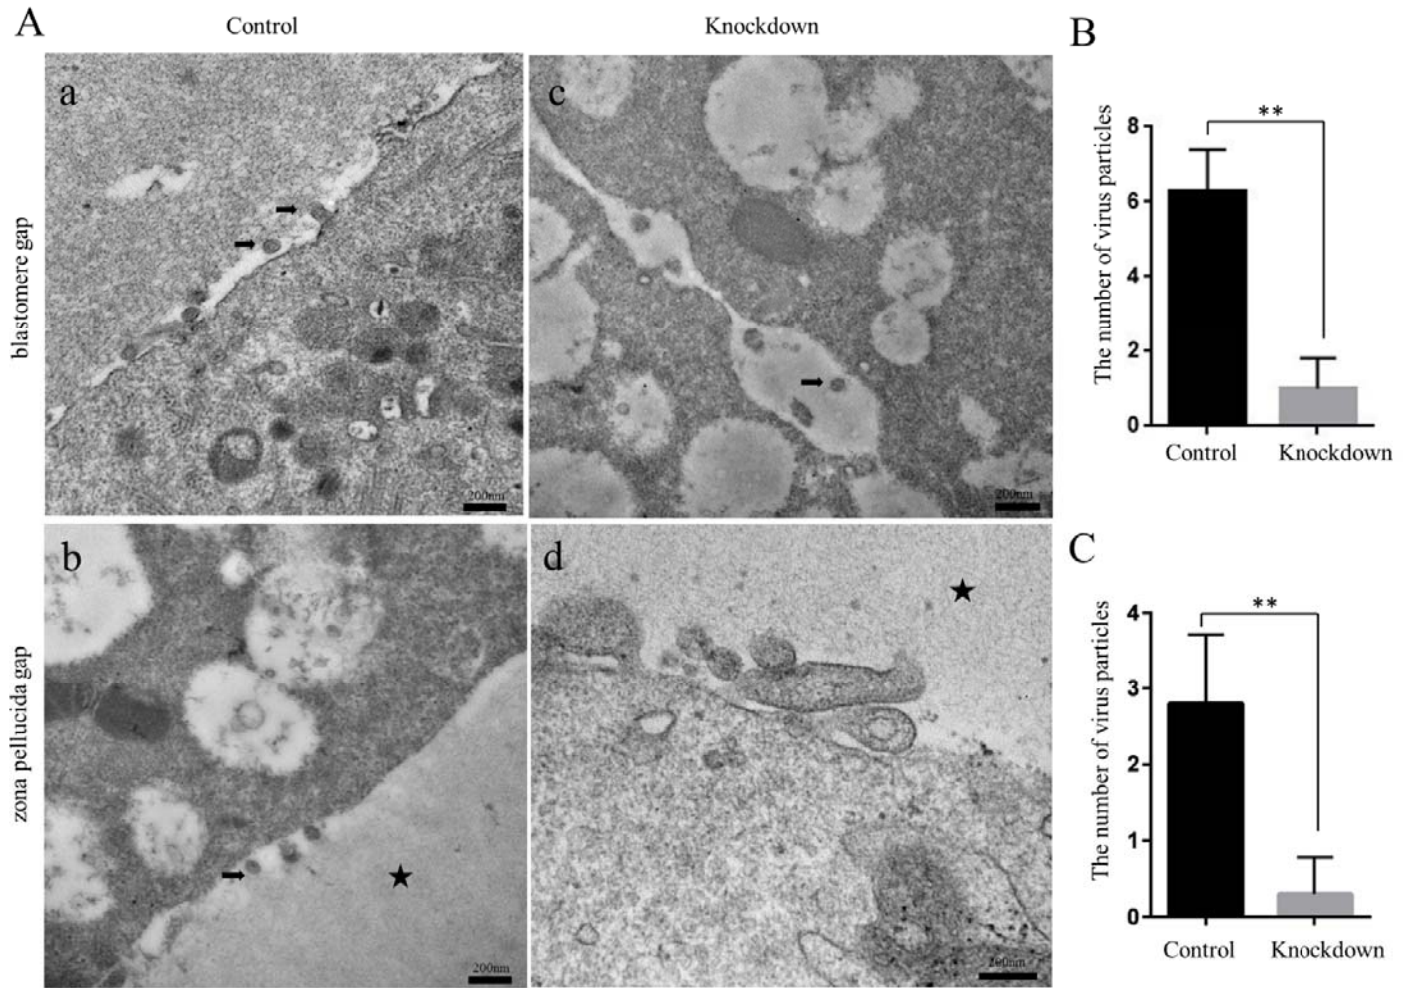

692

693 **Fig.5**

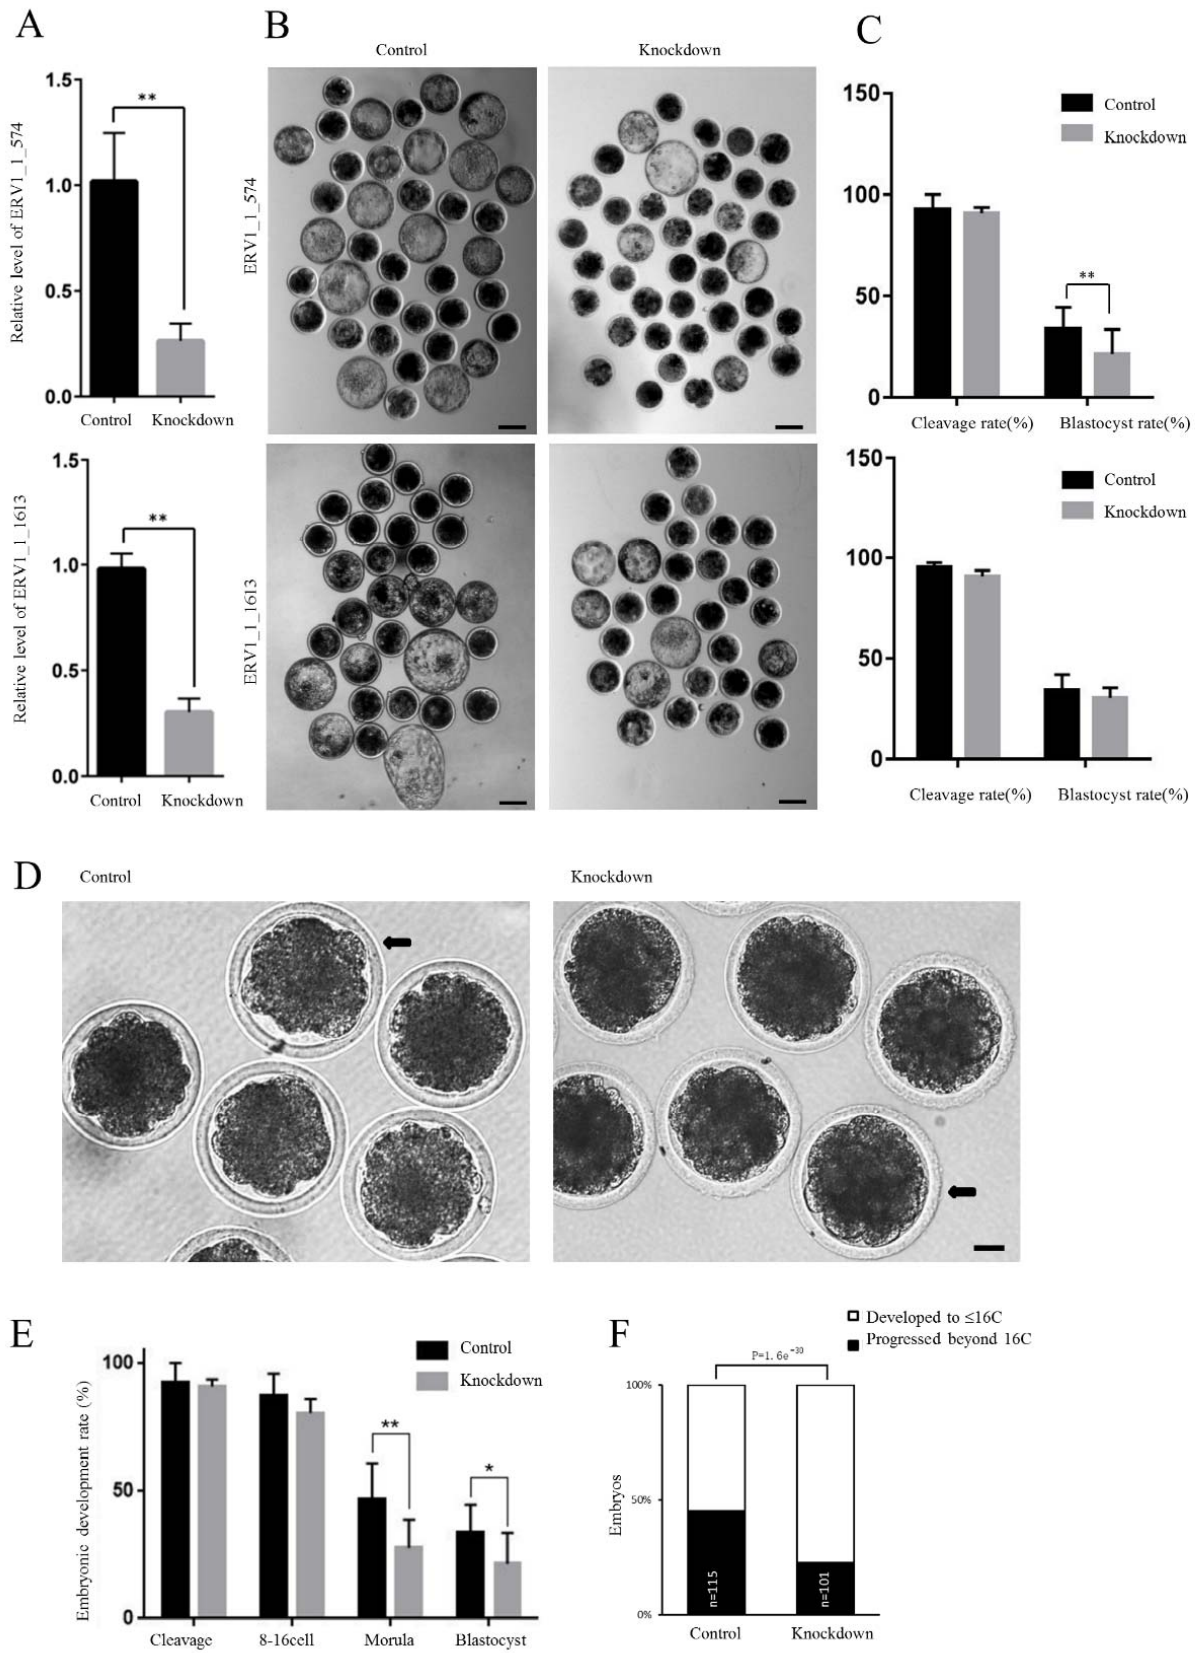

694 **Fig.6**

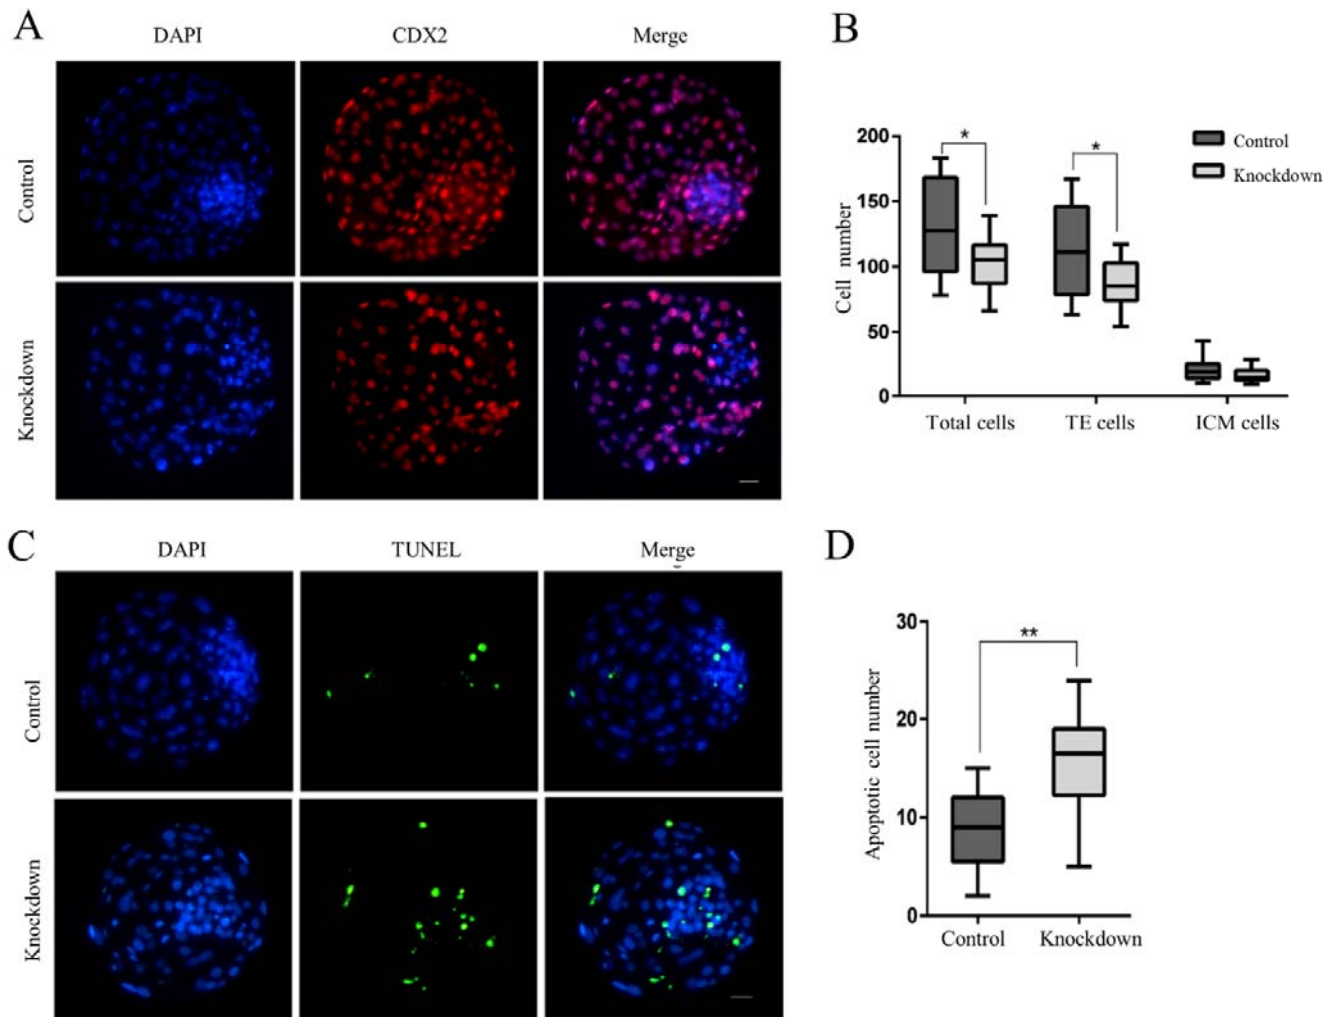

695

696 **Fig.7**

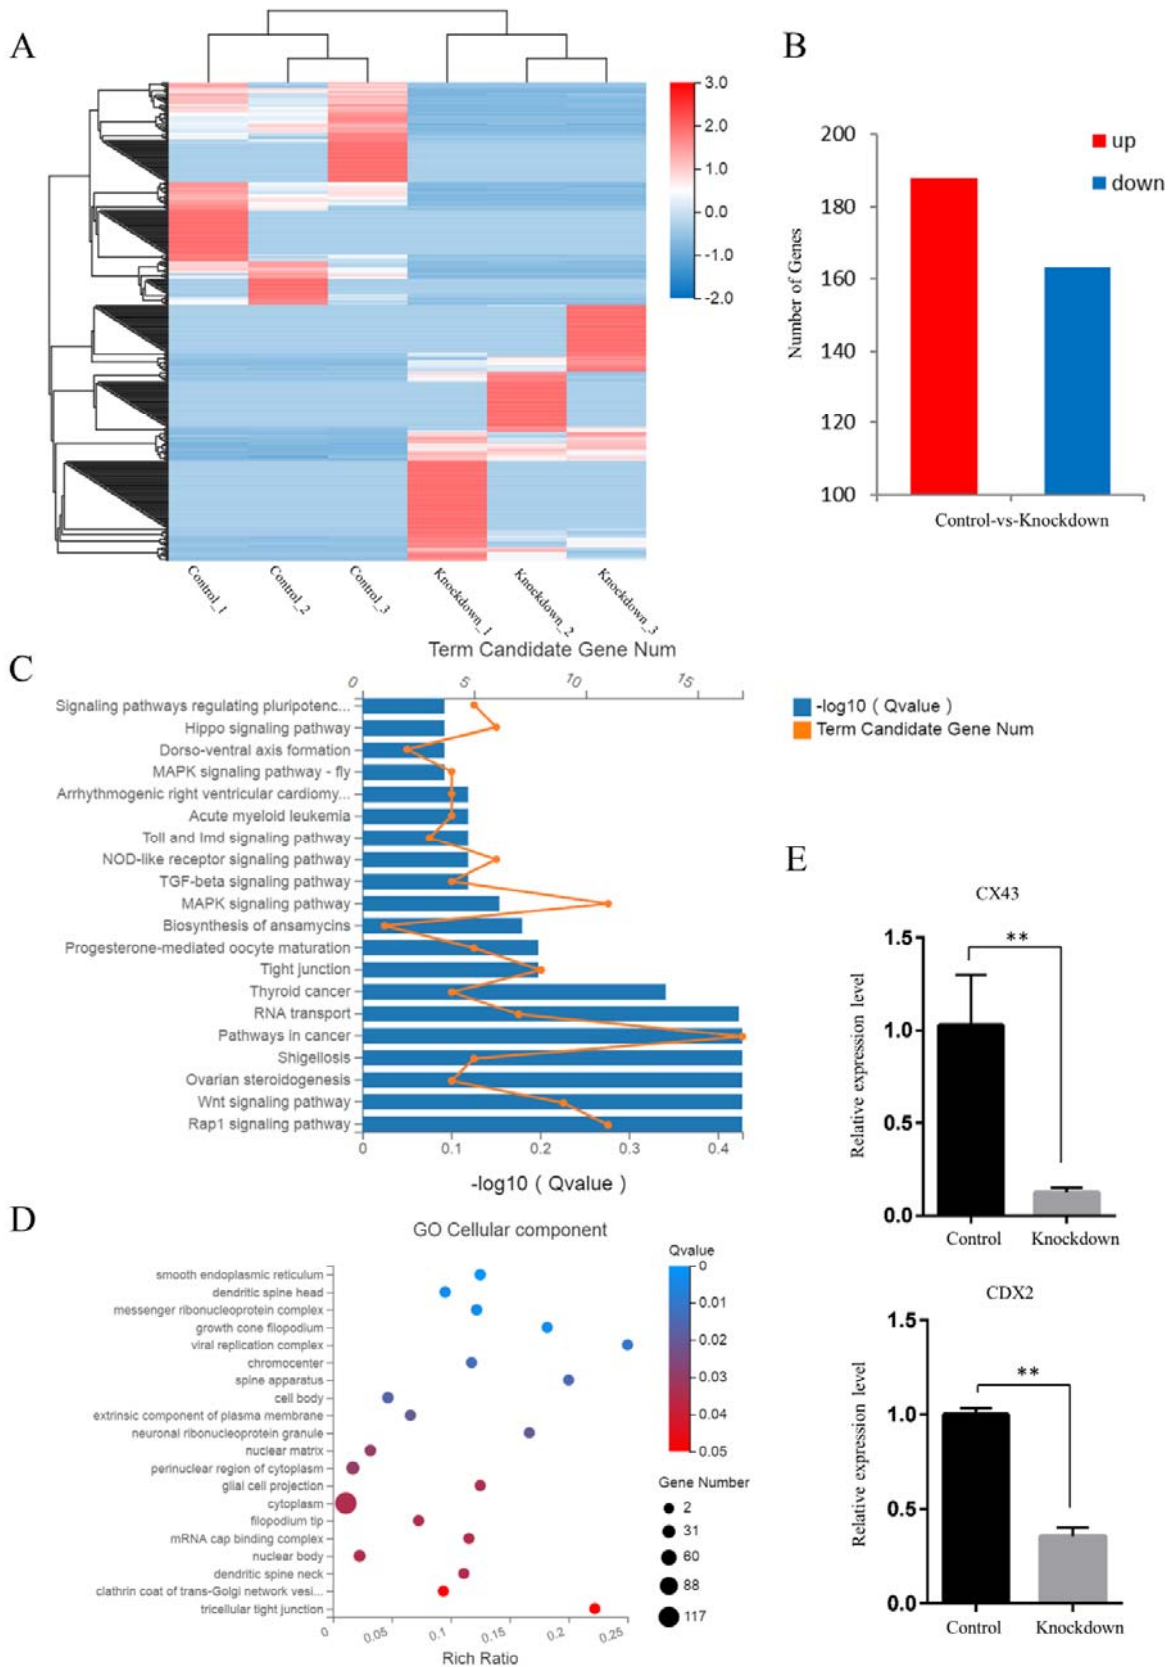

697 **Fig.S1**

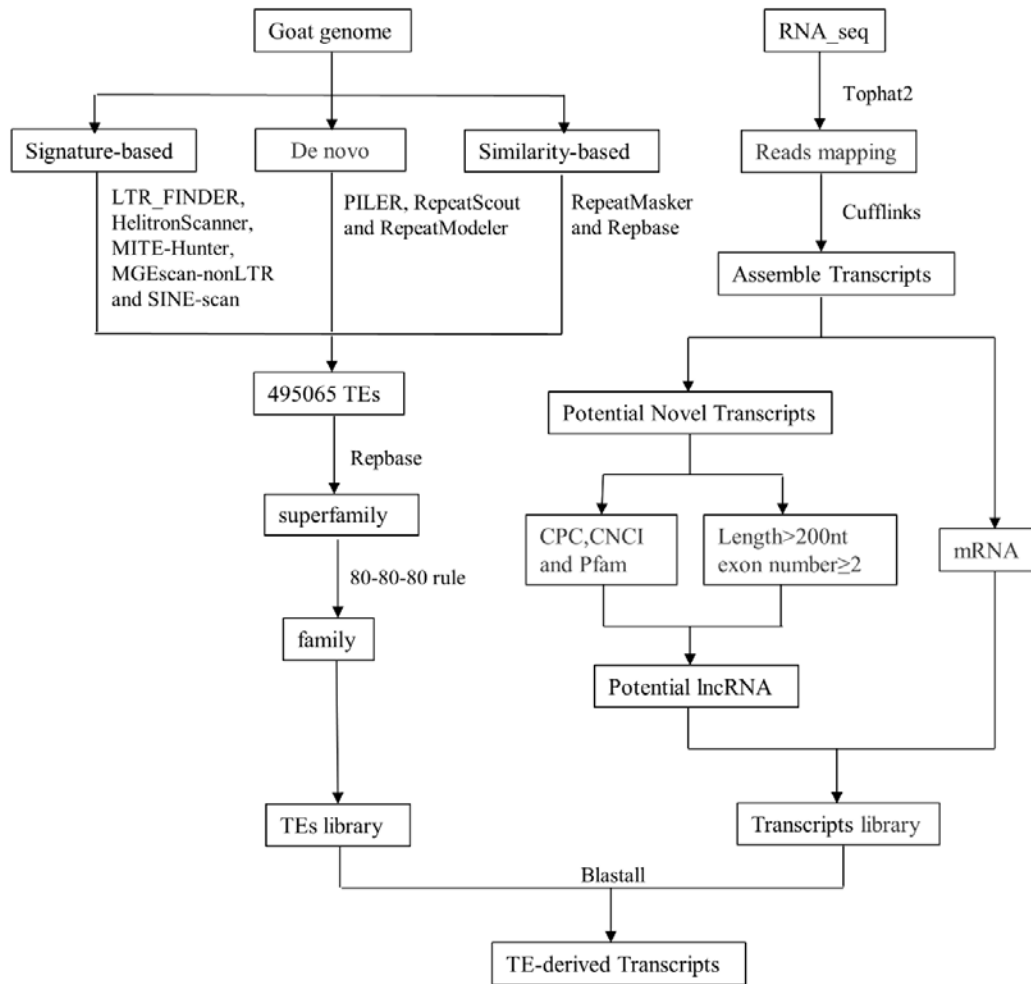

698

699

700 Fig.S2

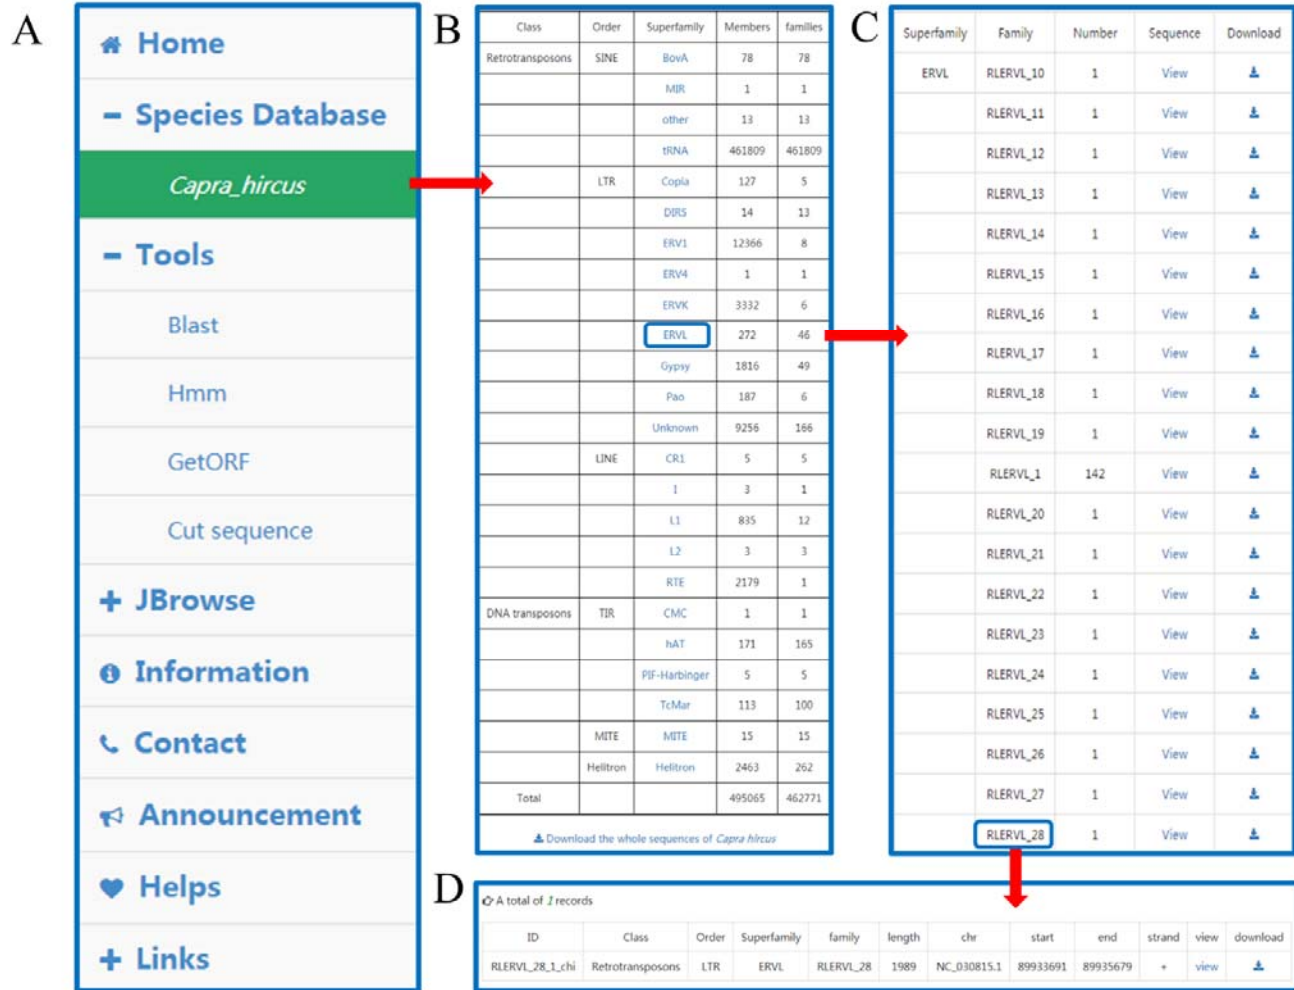

701

702 **Fig.S3**

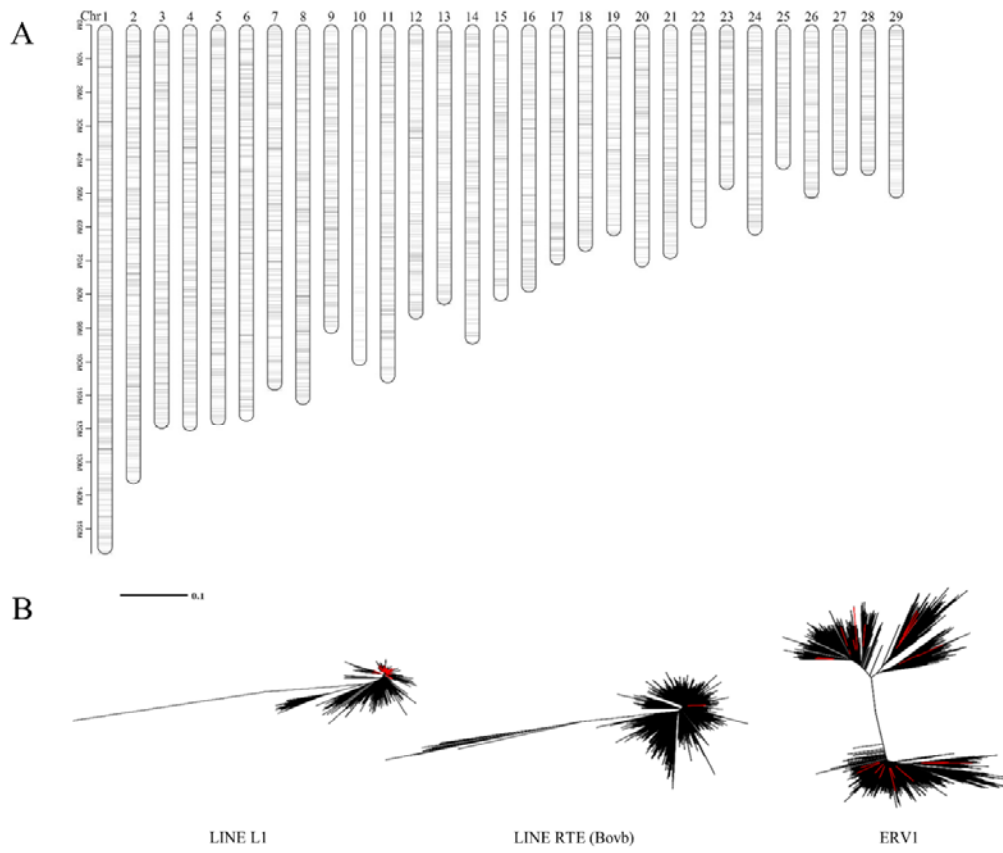

703

704



705 **Fig.S4**

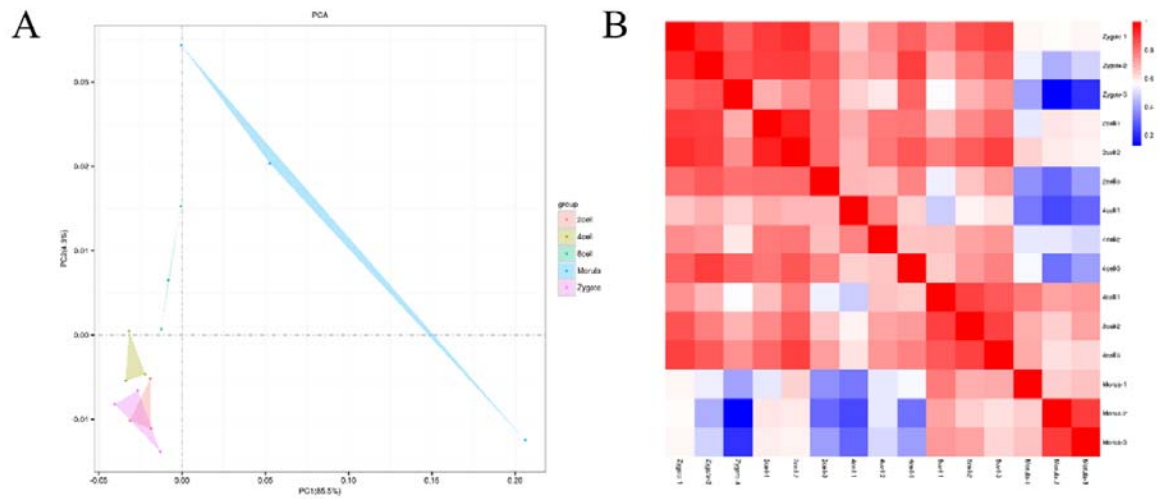

706

707

708 **Fig.S5**

**A**

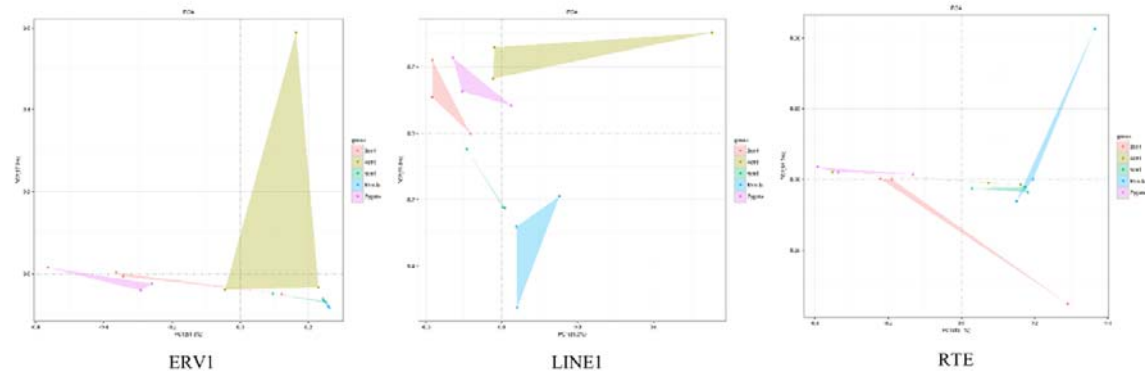

**B**

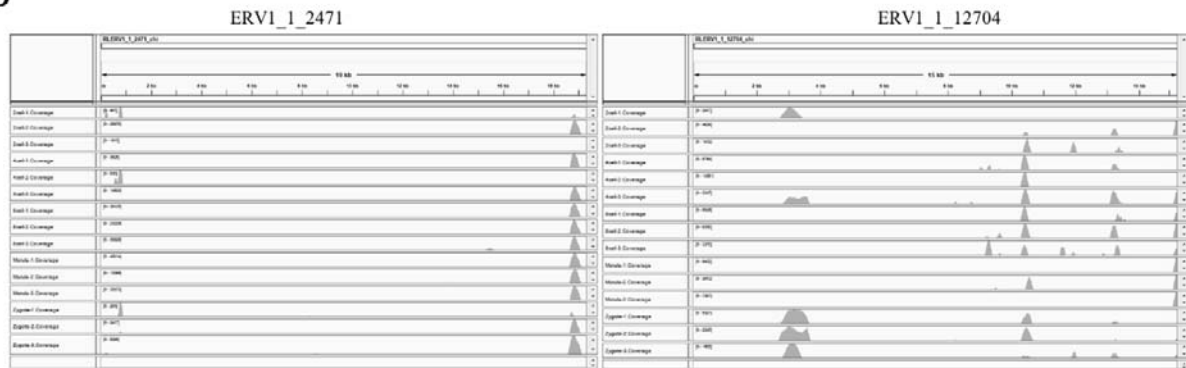

**C**

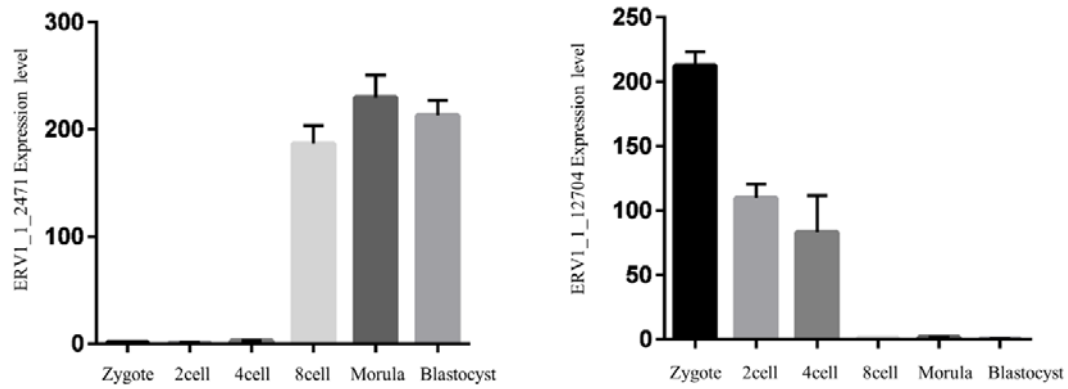

709

710 Fig.S6

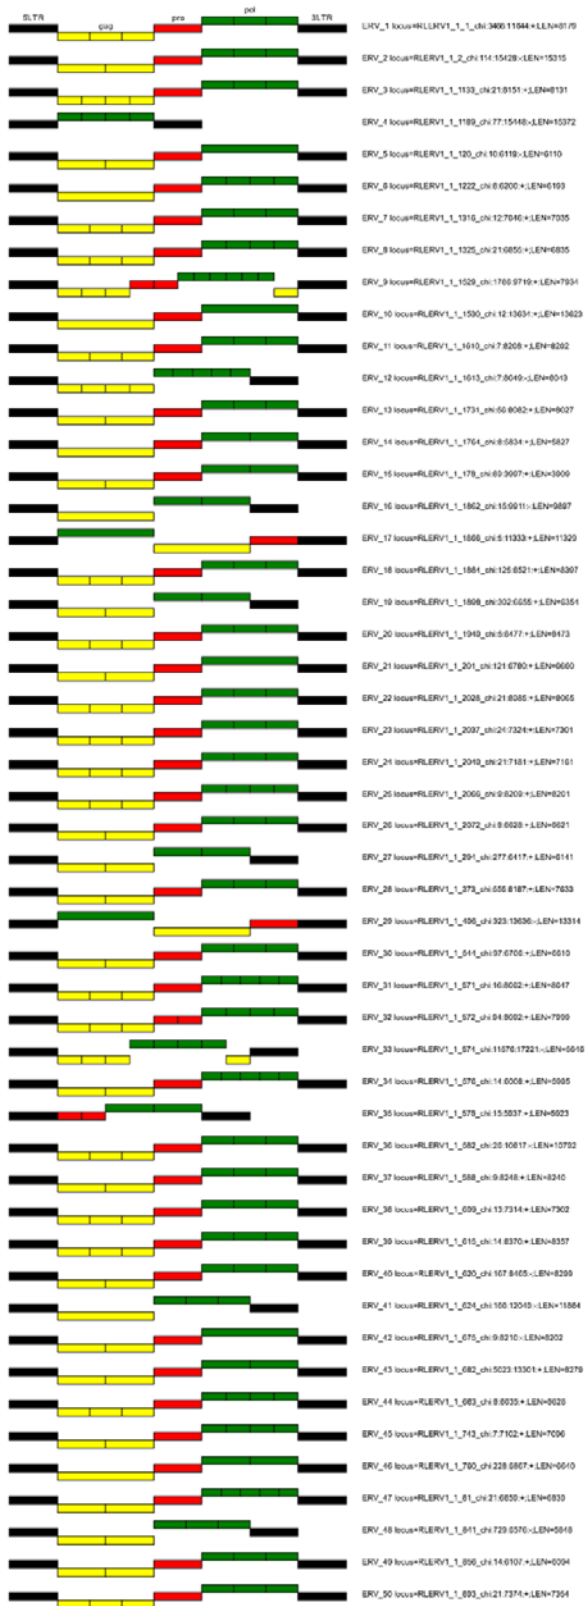

Source: https://www.biorxiv.org/content/10.1101/2022.06.21.496818v1.full.pdf
